# Supplementary material for: The TGF-β ligand DBL-1 is a key player in a multifaceted probiotic protection against MRSA in C. elegans
Source: PubMed Central journal article supplement (PMC8139972; doi:10.1038/s41598-021-89831-y), 2021-05-21
Supplement: 41598_2021_89831_MOESM1_ESM.pdf [file 41598_2021_89831_MOESM1_ESM.pdf]

Supporting information for

## The TGF- $\beta$ ligand DBL-1 is a key player in a multifaceted probiotic protection against MRSA in *C. elegans*

Maria G. M. Mørch<sup>1+</sup>, Katrine V. Møller<sup>1+</sup>, Marianne O. Hesselager<sup>1+</sup>, Rikke H. Harders<sup>1</sup>, Caroline L. Kidmose<sup>1</sup>, Therese Buhl<sup>1</sup>, Kurt Fuursted<sup>2</sup>, Emøke Bendixen<sup>3</sup>, Chong Shen<sup>4</sup>, Lotte G. Christensen<sup>4</sup>, Charlotte H. Poulsen<sup>4</sup>, Anders Olsen<sup>1\*</sup>

<sup>1</sup> Department of Chemistry and Bioscience, Aalborg University, Aalborg, Denmark.

<sup>2</sup> Statens Serum Institut, Copenhagen, Denmark.

<sup>3</sup> Department of Molecular Biology and Genetics, Aarhus University, Aarhus, Denmark.

<sup>4</sup> Gut Immunology Lab, Technology & Innovation, DuPont Nutrition & Biosciences, Aarhus, Denmark.

+ These authors contributed equally to this work.

Keywords: *Caenorhabditis elegans*, probiotic bacteria, *Lactobacillus*, TGF- $\beta$ , MRSA, proteomics.

\* Corresponding Author:

E-mail: [ao@bio.aau.dk](mailto:ao@bio.aau.dk)

Supplementary figures:

**Figure S1. Combined lifespan data from six independent experiments.** All lifespan data from *rrf-3* mutants fed OP50 and Lb21 analyzed in one data set. For OP50 n= 823, and for Lb21 n = 648.

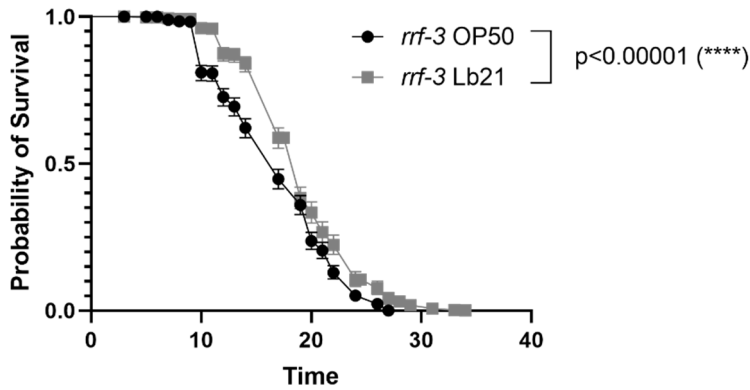

**Figure S2. Longevity analysis of Lb21, Lb21.1 (*L. plantarum*), and Lb21.2 (*L. brevis*).**

The individual strains of Lb21 are not able to extend the lifespan of *C. elegans* to the same level as the combination. Animals alive at day 18 in each group OP50: 25/88, LB21: 55/99, LB21.1: 42/117, and LB21.2: 8/73.

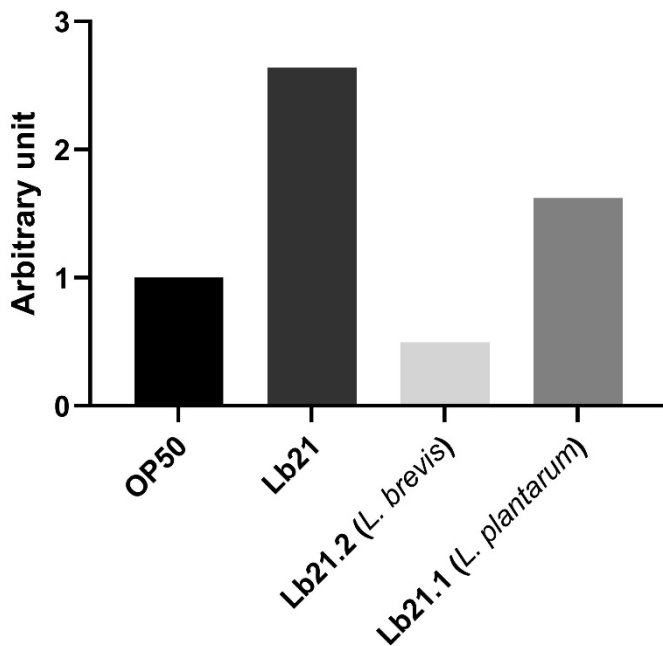

**Figure S3. MRSA protection with Lb21 individual strains.**

The individual strains of Lb21 are not able to protect *C. elegans* against MRSA infection to the same degree as the combination. Lb21.1 (*L. plantarum*), Lb21.2 (*L. brevis*). To obtain sterile strains the *rrf-3* (a) and *glp-4* (b) mutants were used.

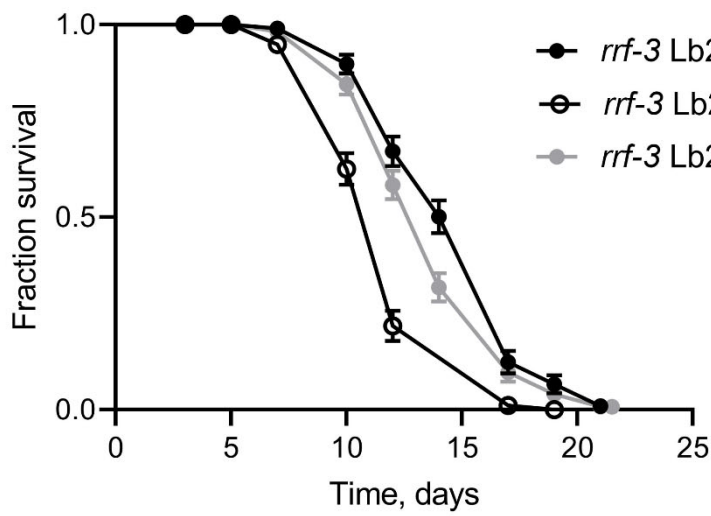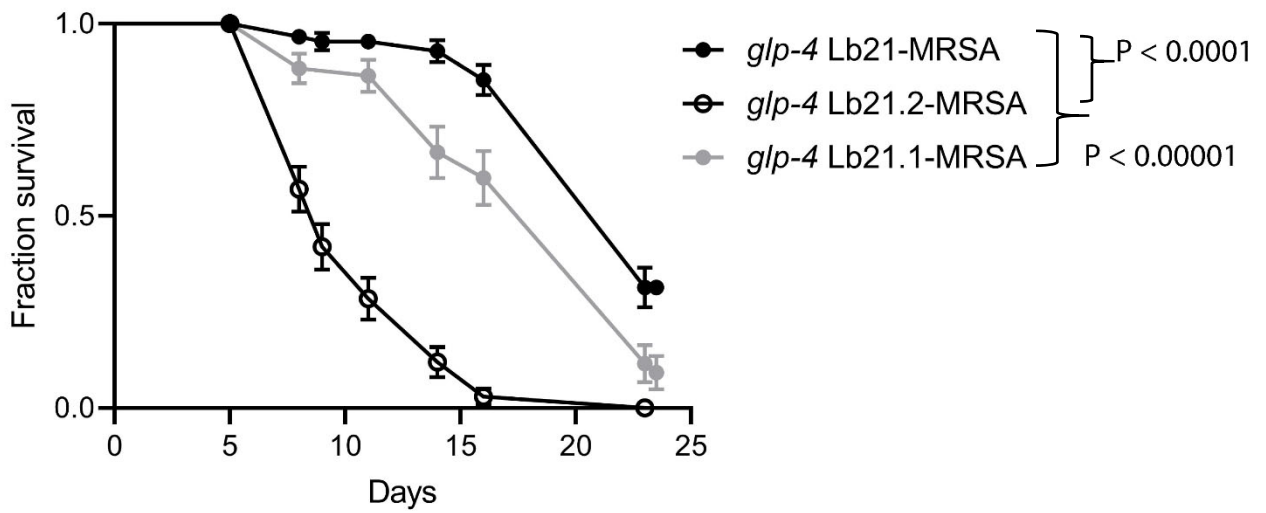

**Figure S4. Lb21 and Lb23 does not inhibit pathogenic bacterial growth *in vitro*.**  
 The effect of Lb21 and Lb23 on MRSA 43484 and F18 ETEC growth was assessed at 25°C. No inhibitory effect was observed.

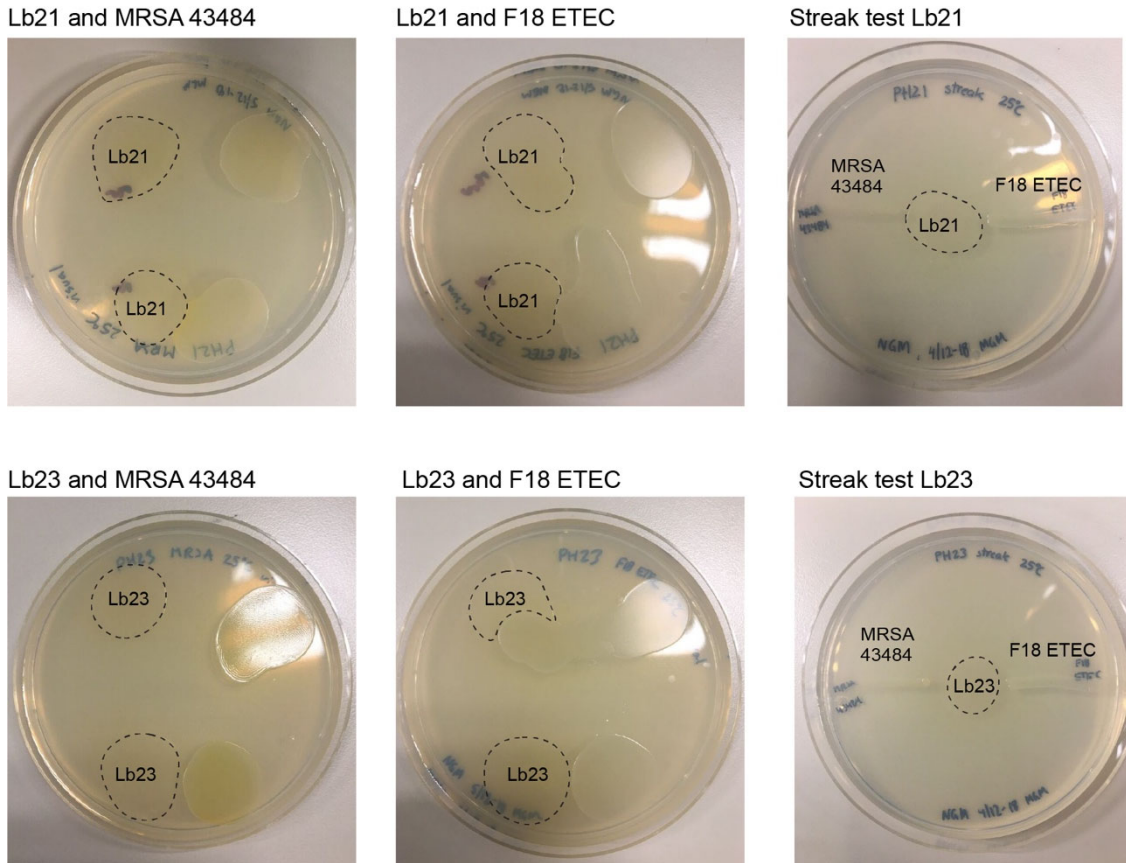

**Figure S5. Lb21 does not secrete an antimicrobial agent.**  
 Spent media (Supernatant – Lb21Sup) did not provide protection against MRSA. UV irradiation of Lb21 did not remove the protective effect.

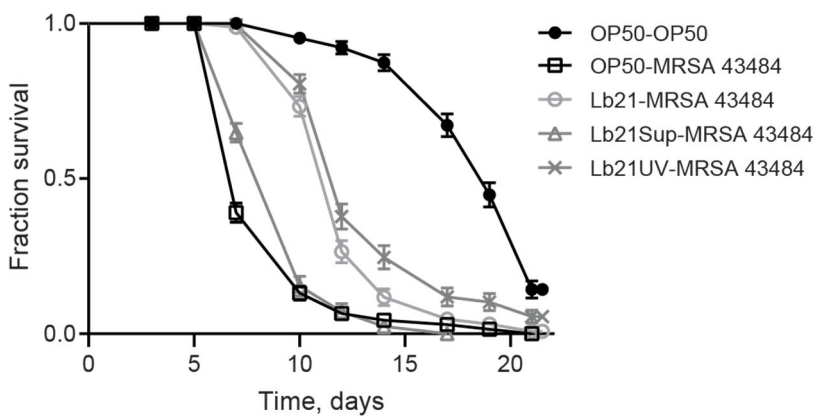

Supplementary tables:

**Table S1. All lifespans and MRSA assays (Mean survival, p-value and no. of animals).**

| Strain              | Bacteria           | Mean survival Days $\pm$ SD | P-Value Log-rank test compared to OP50 or OP50-MRSA | P-value Log-rank test between specified groups | No. of animals              | Experiment no. |                                     |     |
|---------------------|--------------------|-----------------------------|-----------------------------------------------------|------------------------------------------------|-----------------------------|----------------|-------------------------------------|-----|
| <i>rrf-3</i>        | OP50               | 20.3 $\pm$ 2.9              | <0.0001 (****)                                      |                                                | 134                         | 1              |                                     |     |
|                     | Lb21               | 23.4 $\pm$ 4.8              |                                                     |                                                | 74                          |                |                                     |     |
| <i>rrf-3</i>        | OP50               | 14.1 $\pm$ 4.9              | <0.0001 (***)                                       |                                                | 77                          | 2              |                                     |     |
|                     | Lb21               | 19.5 $\pm$ 5.2              |                                                     |                                                | 86                          |                |                                     |     |
| <i>rrf-3</i>        | OP50               | 16.6 $\pm$ 5.5              | <0.0001 (***)                                       |                                                | 193                         | 3              |                                     |     |
|                     | Lb21               | 19.7 $\pm$ 3.7              |                                                     |                                                | 132                         |                |                                     |     |
| <i>rrf-3</i>        | OP50               | 13.6 $\pm$ 3.1              | <0.0001 (***)                                       |                                                | 77                          | 4              |                                     |     |
|                     | Lb21               | 15.0 $\pm$ 2.8              |                                                     |                                                | 161                         |                |                                     |     |
| <i>rrf-3</i>        | OP50               | 15.5 $\pm$ 4.9              | ns (0.1207)                                         |                                                | 114                         | 5              |                                     |     |
|                     | Lb21               | 17.1 $\pm$ 4.5              |                                                     |                                                | 21                          |                |                                     |     |
| <i>rrf-3</i>        | OP50               | 16.4 $\pm$ 4.0              | 0.0002 (***)                                        |                                                | 228                         | 6              |                                     |     |
|                     | Lb21               | 17.9 $\pm$ 3.2              |                                                     |                                                | 174                         |                |                                     |     |
| <i>rrf-3</i>        | OP50               | 16.7 $\pm$ 3.1              | <0.0001 (***)                                       |                                                | 170                         | 7              |                                     |     |
|                     | Lb23               | 14.5 $\pm$ 3.4              |                                                     |                                                | 112                         |                |                                     |     |
| <i>rrf-3</i>        | OP-MRSA 64         | 7.5 $\pm$ 1.6               | <0.0001 (***)                                       | Lb21 vs Lb23:<br><0.0001 (****)                | 191                         | 8              |                                     |     |
|                     | Lb21-MRSA 64       | 10.3 $\pm$ 2.7              |                                                     |                                                | 123                         |                |                                     |     |
|                     | Lb23-MRSA 64       | 8.3 $\pm$ 2.1               |                                                     |                                                | Lb23 vs OP50:<br>0.0102 (*) |                | 202                                 |     |
| <i>rrf-3</i>        | OP-MRSA 64         | 8.7 $\pm$ 2.7               | <0.0001 (****)                                      | Lb21 vs Lb23:<br><0.0001 (****)                | 110                         | 9              |                                     |     |
|                     | Lb21-MRSA 64       | 11.9 $\pm$ 3.3              |                                                     |                                                | 59                          |                |                                     |     |
|                     | Lb23-MRSA 64       | 9.2 $\pm$ 2.6               |                                                     |                                                | Lb23 vs OP50:<br>ns         |                | 31                                  |     |
| <i>rrf-3</i>        | OP-MRSA 43484      | 8.5 $\pm$ 2.1               | <0.0001 (****)                                      | Lb21 vs Lb23:<br><0.0001 (****)                | 110                         | 10             |                                     |     |
|                     | Lb21-MRSA 43484    | 12.2 $\pm$ 3.5              |                                                     |                                                | 59                          |                |                                     |     |
|                     | Lb23-MRSA 43484    | 8.2 $\pm$ 1.7               |                                                     |                                                | Lb23 vs OP50:<br>ns         |                | 31                                  |     |
| <i>rrf-3</i>        | OP-MRSA 43484      | 8.3 $\pm$ 2.4               | <0.0001 (****)                                      | Lb21 vs Lb21sup:<br><0.0001 (****)             | 226                         | 11             |                                     |     |
|                     | Lb21-MRSA 43484    | 12.1 $\pm$ 2.4              |                                                     |                                                | 154                         |                |                                     |     |
|                     | Lb21Sup-MRSA 43484 | 8.7 $\pm$ 2.1               |                                                     |                                                | 0.0001 (***)                |                | LB21UV vs LB21Sup:<br>0.0001 (****) | 160 |
|                     | Lb21UV-MRSA 43484  | 12.7 $\pm$ 2.8              |                                                     |                                                | <0.0001 (****)              |                | Lb21UV vs Lb21:<br>0.0018 (**)      | 132 |
| <i>rrf-3</i>        | OP-MRSA 43484      | 9.5 $\pm$ 2.3               | <0.0001 (****)                                      |                                                | 153                         | 12             |                                     |     |
|                     | Lb21-MRSA 43484    | 12.2 $\pm$ 2.8              |                                                     |                                                | 110                         |                |                                     |     |
| <i>daf-16;rrf-3</i> | OP-MRSA 43484      | 8.0 $\pm$ 1.6               | <0.0001 (****)                                      |                                                | 205                         |                |                                     |     |
|                     | Lb21-MRSA 43484    | 10.7 $\pm$ 2.6              |                                                     |                                                | 202                         |                |                                     |     |
| <i>rrf-3;pmk-1</i>  | OP-MRSA 43484      | 8.5 $\pm$ 2.3               | <0.0001 (****)                                      |                                                | 190                         |                |                                     |     |
|                     | Lb21-MRSA 43484    | 11.5 $\pm$ 3.3              |                                                     |                                                | 234                         |                |                                     |     |

| Strain              | Bacteria        | Mean survival Days $\pm$ SD | P-Value Log-rank test compared to OP50 or OP50-MRSA | P-value Log-rank test between specified groups | No. of animals | Experiment no. |
|---------------------|-----------------|-----------------------------|-----------------------------------------------------|------------------------------------------------|----------------|----------------|
| <i>rrf-3</i>        | OP-MRSA 43484   | 7.5 $\pm$ 1.1               |                                                     |                                                | 179            | 13             |
|                     | Lb21-MRSA 43484 | 13.4 $\pm$ 3.2              | <0.0001 (****)                                      | Lb21 vs Lb23: 0.0117 (*)                       | 152            |                |
|                     | Lb23-MRSA 43484 | 12.6 $\pm$ 3.1              | <0.0001 (****)                                      |                                                | 50             |                |
| <i>daf-16;rrf-3</i> | OP-MRSA 43484   | 8.4 $\pm$ 1.9               |                                                     |                                                | 64             |                |
|                     | Lb21-MRSA 43484 | 12.1 $\pm$ 3.0              | <0.0001 (****)                                      | Lb21 vs Lb23: 0.0001 (****)                    | 153            |                |
|                     | Lb23-MRSA 43484 | 8.2 $\pm$ 1.9               | ns (0.5297)                                         |                                                | 45             |                |
| <i>rrf-3;pmk-1</i>  | OP-MRSA 43484   | 7.8 $\pm$ 1.4               |                                                     |                                                | 161            |                |
|                     | Lb21-MRSA 43484 | 10.8 $\pm$ 2.9              | <0.0001 (****)                                      | Lb21 vs Lb23: 0.0001 (****)                    | 165            |                |
|                     | Lb23-MRSA 43484 | 8.5 $\pm$ 2.8               | 0.0018 (**)                                         |                                                | 76             |                |
| <i>rrf-3</i>        | OP-MRSA 43484   | 10.8 $\pm$ 2.2              |                                                     |                                                | 138            | 14             |
|                     | Lb21-MRSA 43484 | 14.8 $\pm$ 3.1              | <0.0001 (****)                                      |                                                | 99             |                |
| <i>tol-1;rrf-3</i>  | OP-MRSA 43484   | 11.5 $\pm$ 3.5              |                                                     |                                                | 172            |                |
|                     | Lb21-MRSA 43484 | 15.8 $\pm$ 4.5              | <0.0001 (****)                                      |                                                | 214            |                |
| <i>rrf-3;dbl-1</i>  | OP-MRSA 43484   | 9.8 $\pm$ 3.3               | <0.0001 (****)                                      |                                                | 222            |                |
|                     | Lb21-MRSA 43484 | 8.7 $\pm$ 2.0               |                                                     |                                                | 260            |                |
| <i>rrf-3</i>        | OP-MRSA 43484   | 9.4 $\pm$ 1.8               |                                                     |                                                | 167            | 15             |
|                     | Lb21-MRSA 43484 | 10.1 $\pm$ 1.4              | <0.0001 (****)                                      |                                                | 58             |                |
| <i>tol-1;rrf-3</i>  | OP-MRSA 43484   | 9.9 $\pm$ 2.1               |                                                     |                                                | 129            |                |
|                     | Lb21-MRSA 43484 | 11.2 $\pm$ 1.8              | <0.0001 (****)                                      |                                                | 79             |                |
| <i>rrf-3;dbl-1</i>  | OP-MRSA 43484   | 8.0 $\pm$ 1.6               | 0.0037 (**)                                         |                                                | 234            |                |
|                     | Lb21-MRSA 43484 | 7.6 $\pm$ 1.2               |                                                     |                                                | 227            |                |
| <i>rrf-3</i>        | OP-MRSA 43484   | 10.9 $\pm$ 2.9              |                                                     |                                                | 116            | 16             |
|                     | Lb21-MRSA 43484 | 20.0 $\pm$ 7.8              | <0.0001 (****)                                      |                                                | 47             |                |
| <i>rrf-3;asp-6</i>  | OP-MRSA 43484   | 9.9 $\pm$ 2.7               |                                                     |                                                | 93             |                |
|                     | Lb21-MRSA 43484 | 11.0 $\pm$ 2.5              | <0.0001 (****)                                      |                                                | 60             |                |
| <i>rrf-3</i>        | OP-OP           | 12.9 $\pm$ 3.1              |                                                     |                                                | 190            | 17             |
|                     | OP-MRSA 43484   | 7.6 $\pm$ 1.3               |                                                     |                                                | 195            |                |
|                     | Lb21-MRSA 43484 | 14.6 $\pm$ 3.1              | <0.0001 (****)                                      | Lb21 vs Lb23: <0.0001 (****)                   | 128            |                |
|                     | Lb23-MRSA 43484 | 10.3 $\pm$ 2.3              | <0.0001 (****)                                      |                                                | 158            |                |
| <i>rrf-3;asp-6</i>  | OP-OP           | 12.6 $\pm$ 2.9              |                                                     |                                                | 227            |                |
|                     | OP-MRSA 43484   | 8.5 $\pm$ 2.1               |                                                     |                                                | 202            |                |
|                     | Lb21-MRSA 43484 | 12.8 $\pm$ 3.1              | <0.0001 (****)                                      | Lb21 vs Lb23: <0.0001 (****)                   | 96             |                |
|                     | Lb23-MRSA 43484 | 9.9 $\pm$ 2.6               | <0.0001 (****)                                      |                                                | 122            |                |
| <i>rrf-3;acs-22</i> | OP-OP           | 8.3 $\pm$ 1.8               |                                                     |                                                | 164            |                |
|                     | OP-MRSA 43484   | 8.0 $\pm$ 1.4               |                                                     |                                                | 180            |                |
|                     | Lb21-MRSA 43484 | 10.0 $\pm$ 2.1              | <0.0001 (****)                                      | Lb21 vs. Lb23: 0.4356 (ns)                     | 164            |                |
|                     | Lb23-MRSA 43484 | 9.8 $\pm$ 2.4               | <0.0001 (****)                                      |                                                | 99             |                |
| <i>rrf-3;vit-2</i>  | OP-OP           | 9.3 $\pm$ 2.2               |                                                     |                                                | 92             |                |
|                     | OP-MRSA 43484   | 8.3 $\pm$ 2.1               |                                                     |                                                | 106            |                |
|                     | Lb21-MRSA 43484 | 9.5 $\pm$ 2.4               | <0.0001 (****)                                      | Lb21 vs. Lb23: <0.0001 (****)                  | 79             |                |
|                     | Lb23-MRSA 43484 | 7.3 $\pm$ 1.9               | 0.0029 (**)                                         |                                                | 53             |                |

| Strain               | Bacteria                             | Mean survival Days $\pm$ SD | P-Value Log-rank test compared to OP50 or OP50-MRSA | P-value Log-rank test between specified groups                     | No. of animals | Experiment no. |
|----------------------|--------------------------------------|-----------------------------|-----------------------------------------------------|--------------------------------------------------------------------|----------------|----------------|
| <i>rrf-3</i>         | OP-OP                                | 16.5 $\pm$ 2.6              |                                                     |                                                                    | 56             | 18             |
|                      | OP-MRSA 43484                        | 8.3 $\pm$ 2.2               |                                                     |                                                                    | 215            |                |
|                      | Lb21-MRSA 43484                      | 13.9 $\pm$ 3.3              | <0.0001(****)                                       |                                                                    | 43             |                |
| <i>rrf-3;acs-22</i>  | OP-OP                                | 17.4 $\pm$ 3.3              |                                                     |                                                                    | 73             |                |
|                      | OP-MRSA 43484                        | 8.8 $\pm$ 2.2               |                                                     |                                                                    | 195            |                |
|                      | Lb21-MRSA 43484                      | 11.7 $\pm$ 3.4              | <0.0001(****)                                       | <i>rrf-3</i> Lb21-MRSA vs <i>acs-22</i> Lb21-MRSA: 0.0067 (**)     | 174            |                |
| <i>rrf-3;srp-7</i>   | OP-OP                                | 16.7 $\pm$ 3.0              |                                                     |                                                                    | 79             |                |
|                      | OP-MRSA 43484                        | 10.0 $\pm$ 2.8              |                                                     |                                                                    | 179            |                |
|                      | Lb21-MRSA 43484                      | 13.4 $\pm$ 4.4              | <0.0001 (****)                                      | <i>rrf-3</i> Lb21-MRSA vs <i>rrf-3;srp-7</i> Lb21-MRSA: ns         | 80             |                |
| <i>rrf-3</i>         | OP-OP                                | 12.9 $\pm$ 3.1              |                                                     |                                                                    | 190            | 19             |
|                      | OP-MRSA 43484                        | 7.6 $\pm$ 1.3               |                                                     |                                                                    | 195            |                |
|                      | Lb21 <i>L. brevis</i> -MRSA 43484    | 11.7 $\pm$ 2.8              |                                                     | Lb21 vs Lb21 <i>L. plantarum</i> : <0.0109 (*)                     | 115            |                |
|                      | Lb21 <i>L. plantarum</i> -MRSA 43484 | 13.6 $\pm$ 3.0              |                                                     | Lb21 <i>L. brevis</i> vs Lb21 <i>L. plantarum</i> : <0.0001 (****) | 160            |                |
|                      | Lb21-MRSA 43484                      | 14.6 $\pm$ 3.1              |                                                     | Lb21 vs Lb21 <i>L. brevis</i> : <0.0001 (****)                     | 128            |                |
| <i>glp-4</i>         | OP-OP                                | 19.7 $\pm$ 5.1              |                                                     |                                                                    | 107            | 20             |
|                      | OP-MRSA 43484                        | 11.1 $\pm$ 3.7              |                                                     |                                                                    | 128            |                |
|                      | Lb21 <i>L. brevis</i> -MRSA 43484    | 10.6 $\pm$ 3.5              |                                                     | Lb21 vs Lb21 <i>L. brevis</i> : <0.0001 (****)                     | 69             |                |
|                      | Lb21 <i>L. plantarum</i> -MRSA 43484 | 17.6 $\pm$ 6.0              |                                                     | Lb21 <i>L. brevis</i> vs Lb21 <i>L. plantarum</i> : <0.0001 (****) | 43             |                |
|                      | Lb21-MRSA 43484                      | 20.8 $\pm$ 4.4              |                                                     | Lb21 vs Lb21 <i>L. plantarum</i> : <0.0001 (****)                  | 55             |                |
| <i>glp-4;clec-65</i> | OP-OP                                | 17.8 $\pm$ 4.2              |                                                     |                                                                    | 123            | 21             |
|                      | OP-MRSA 43484                        | 10.8 $\pm$ 2.4              |                                                     |                                                                    | 92             |                |
|                      | Lb21-MRSA 43484                      | 21.2 $\pm$ 4.1              | <0.0001 (****)                                      | <i>glp-4</i> Lb21-MRSA vs <i>glp-4;clec-65</i> Lb21-MRSA: ns       | 68             |                |
|                      |                                      |                             |                                                     |                                                                    |                |                |
|                      | Lb23-MRSA 43484                      | 13.8 $\pm$ 5.9              | <0.0001 (****)                                      |                                                                    | 77             |                |

**Table S2. Basic statistics of the genome assembly of Lb21 and Lb23.**

| Genome                       | Classification by GTDB | Genome size | GC content (%) | Longest scaffold | Scaffold N50 | # Contigs | # Ns | Completeness (%) | Contamination (%) |
|------------------------------|------------------------|-------------|----------------|------------------|--------------|-----------|------|------------------|-------------------|
| Lb21<br>(CP463_03)           | <i>L. plantarum</i>    | 5350930     | 45.3           | 275932           | 49970        | 215       | 0    | 100.00           | 100.00            |
| Lb21.1<br>(CP463_03_subset1) | <i>L. plantarum</i>    | 2949087     | 44.8           | 275932           | 84333        | 76        | 0    | 99.07            | 2.78              |
| Lb21.2<br>(CP463_03_subset2) | <i>L. brevis</i>       | 2431927     | 45.9           | 80868            | 30857        | 139       | 0    | 98.44            | 0.00              |
| Lb23<br>(CP463_04)           | <i>L. brevis</i>       | 2478959     | 45.8           | 470263           | 329543       | 26        | 0    | 99.06            | 0.00              |

**Genome size** is the total size of all scaffolds (bp). **GC content** is the percentage of the genome consisting of GC. **Longest scaffold** is the longest scaffold in the assembly (bp). **Scaffold N50** is a median statistic that indicates that 50% of the entire assembly is included in scaffolds equal to or larger than this size (bp). **# Scaffolds** is the number of scaffolds the assembly consists of. **# Contigs** is the number of contigs the assembly consists of. **# Ns** is the number of ambiguous bases (N) in the assembly. **Completeness** is estimated genome completeness by CheckM based on the presence of essential single copy genes (%). **Contamination** is the estimated genome contamination by CheckM based on the presence of duplicated single copy genes (%). The sequences can be found at NCBI GenBank.



**Table S3. All regulated proteins (Mass Spectrometry).**

| UniProt ID                                                                                           | Gene          | Lb21/Lb23 ratio | log2 (ratio) | Qvalue    | Protein description                                                                                           |
|------------------------------------------------------------------------------------------------------|---------------|-----------------|--------------|-----------|---------------------------------------------------------------------------------------------------------------|
| A0A131MBB2;Q18916                                                                                    | acs-22        | 4,68            | 2,23         | 4,26E-02  | Fatty Acid CoA Synthetase family                                                                              |
| Q9XWZ2;Q9XWZ2-2                                                                                      | acdh-11       | 2,14            | 1,09         | 2,17E-02  | Acyl-CoA dehydrogenase family member 11;Isoform b of Acyl-CoA dehydrogenase family member 11                  |
| H2KY95;Q9TZ51                                                                                        | far-7         | 2,05            | 1,04         | 2,10E-02  | Fatty Acid/Retinol binding protein                                                                            |
| A9Z1L1;G5EBT3                                                                                        | srp-7         | 1,99            | 0,99         | 5,18E-06  | SeRPIn                                                                                                        |
| Q8IG67                                                                                               | let-611       | 1,97            | 0,98         | 3,94E-02  | Uncharacterized protein                                                                                       |
| Q44501                                                                                               | fnta-1        | 1,89            | 0,91         | 4,77E-02  | FarNesylTransferase, Alpha subunit                                                                            |
| Q17761                                                                                               | T25B9.9       | 1,88            | 0,91         | 8,30E-04  | 6-phosphogluconate dehydrogenase, decarboxylating                                                             |
| P05690                                                                                               | vit-2         | 1,88            | 0,91         | 4,80E-256 | Vitellogenin-2                                                                                                |
| Q9N4J2                                                                                               | vit-3         | 1,83            | 0,87         | 1,84E-04  | Vitellogenin-3                                                                                                |
| O02108;Q336L8                                                                                        | cdc-37        | 1,77            | 0,82         | 3,13E-02  | Probable Hsp90 co-chaperone cdc37;Cell Division Cycle related                                                 |
| P18948;P18948-2                                                                                      | vit-6         | 1,77            | 0,82         | 1,17E-231 | Vitellogenin-6;Isoform a of Vitellogenin-6                                                                    |
| O17365                                                                                               | srp-2         | 1,73            | 0,79         | 7,78E-03  | SeRPIn                                                                                                        |
| Q17334                                                                                               | sodh-1        | 1,69            | 0,76         | 3,25E-08  | Alcohol dehydrogenase 1                                                                                       |
| G5ECL3                                                                                               | prp-21        | 1,67            | 0,74         | 2,43E-02  | Pre-RNA processing 21                                                                                         |
| O18693                                                                                               | acs-2         | 1,65            | 0,72         | 1,49E-03  | Fatty Acid CoA Synthetase family                                                                              |
| Q22492                                                                                               | hex-1         | 1,63            | 0,71         | 4,42E-06  | Beta-hexosaminidase A                                                                                         |
| O17795;Q17703                                                                                        | stdh-2;stdh-1 | 1,61            | 0,69         | 1,14E-02  | Putative steroid dehydrogenase 2;Putative steroid dehydrogenase 1                                             |
| Q03577                                                                                               | dars-1        | 1,61            | 0,68         | 2,01E-02  | Aspartate-tRNA ligase, cytoplasmic                                                                            |
| A0A0K3AVS5                                                                                           | CELE_M02H5.8  | 1,59            | 0,67         | 4,66E-02  | Uncharacterized protein                                                                                       |
| Q9GZE9                                                                                               | ldp-1         | 1,53            | 0,62         | 1,96E-06  | Lipid droplet localized protein                                                                               |
| G5EBF3                                                                                               | pud-2.1       | 1,50            | 0,58         | 1,75E-05  | Protein Up-regulated in Daf-2(Gf)                                                                             |
| Q22129                                                                                               | CELE_T03G6.3  | 0,65            | -0,62        | 4,43E-02  | Uncharacterized protein                                                                                       |
| G8JY94;Q21067;Q21067-2                                                                               | ifc-2         | 0,64            | -0,65        | 3,86E-03  | Intermediate Filament, C;Intermediate filament protein ifc-2;Isoform b of Intermediate filament protein ifc-2 |
| Q22169                                                                                               | trap-2        | 0,63            | -0,66        | 3,78E-02  | Translocon-associated protein subunit beta                                                                    |
| Q9XWL1                                                                                               | ttr-17        | 0,63            | -0,67        | 1,87E-03  | TransThyretin-Related family domain                                                                           |
| G1K0V9                                                                                               | iff-1         | 0,62            | -0,68        | 3,23E-02  | Initiation Factor Five (eIF-5A) homolog                                                                       |
| Q22763                                                                                               | nep-22        | 0,61            | -0,70        | 7,02E-05  | NEPrilysin metallopeptidase family                                                                            |
| Q19782                                                                                               | ifd-2         | 0,61            | -0,72        | 1,29E-06  | Intermediate filament protein ifd-2                                                                           |
| Q44985                                                                                               | teg-4         | 0,59            | -0,77        | 3,50E-02  | Tumorous Enhancer of Glp-1(Gf)                                                                                |
| Q9TXK1                                                                                               | CELE_F54E2.1  | 0,58            | -0,78        | 1,43E-02  | Uncharacterized protein                                                                                       |
| M1Z854;Q19286                                                                                        | ifb-2         | 0,57            | -0,80        | 1,38E-17  | Intermediate Filament, B;Intermediate filament protein ifb-2                                                  |
| A0A1T5HUZ1;G5EEI5;H9G348;H9G349;H9G350;H9G351;H9G352;H9G353;H9G354;Q06561;Q06561-2;Q06561-4;Q06561-5 | unc-52        | 0,57            | -0,81        | 2,38E-02  | Uncharacterized protein;Basement membrane proteoglycan;Isoform a, c, f of Basement membrane proteoglycan      |
| O02252                                                                                               | pcp-3         | 0,55            | -0,87        | 1,30E-02  | Prolyl Carboxy Peptidase like                                                                                 |
| Q20660;Q7JP52                                                                                        | hsp-17        | 0,54            | -0,90        | 3,96E-05  | Heat Shock Protein                                                                                            |
| Q9XWU2                                                                                               | sup-1         | 0,52            | -0,93        | 1,30E-02  | Protein SUP-1                                                                                                 |
| Q564Q1;Q564Q1-2                                                                                      | gale-1        | 0,52            | -0,93        | 7,58E-03  | UDP-glucose 4-epimerase;Isoform a of UDP-glucose 4-epimerase                                                  |
| P34528                                                                                               | K12H4.7       | 0,49            | -1,03        | 3,78E-02  | Putative serine protease K12H4.7                                                                              |
| Q21750                                                                                               | aagr-2        | 0,48            | -1,06        | 3,36E-02  | Acid Alpha Glucosidase Relate                                                                                 |
| F5GUD3                                                                                               | tre-3         | 0,48            | -1,07        | 4,06E-03  | Trehalase                                                                                                     |
| Q86NE0                                                                                               | asp-2         | 0,46            | -1,12        | 5,44E-04  | ASpartyl Protease                                                                                             |
| Q19876                                                                                               | thn-2         | 0,44            | -1,17        | 6,39E-04  | THaumatilN family                                                                                             |
| Q23683                                                                                               | CELE_ZK970.7  | 0,44            | -1,17        | 2,96E-06  | Uncharacterized protein                                                                                       |
| Q45444                                                                                               | clec-63       | 0,44            | -1,17        | 2,55E-09  | C-type LECTin                                                                                                 |
| Q18577                                                                                               | C42D4.1       | 0,43            | -1,22        | 3,42E-16  | Uncharacterized protein                                                                                       |
| O76836;Q2V4T0                                                                                        | CELE_T19D12.4 | 0,42            | -1,24        | 5,41E-10  | Uncharacterized protein                                                                                       |
| P43508                                                                                               | cpr-4         | 0,42            | -1,24        | 3,13E-03  | Cathepsin B-like cysteine proteinase 4                                                                        |
| Q9BKP8                                                                                               | C17F4.7       | 0,41            | -1,28        | 1,11E-02  | Uncharacterized protein                                                                                       |
| A0A131MBC3;A0A131MCY4;G5EER7;G5EG67                                                                  | tag-10        | 0,41            | -1,28        | 5,38E-06  | Uncharacterized protein                                                                                       |
| Q09365                                                                                               | ZK1320.3      | 0,41            | -1,29        | 4,74E-03  | Uncharacterized protein ZK1320.3                                                                              |
| P55956                                                                                               | asp-3         | 0,39            | -1,36        | 6,88E-03  | Aspartic protease 3                                                                                           |
| Q86FL8                                                                                               | spp-5         | 0,38            | -1,38        | 1,08E-04  | SaPosin-like Protein family                                                                                   |
| O76672                                                                                               | CELE_H34I24.2 | 0,38            | -1,41        | 1,93E-02  | Uncharacterized protein                                                                                       |
| Q18020                                                                                               | hrg-7         | 0,36            | -1,46        | 9,48E-03  | Heme Responsive protein                                                                                       |
| Q7YTR9                                                                                               | C27B7.9       | 0,35            | -1,50        | 1,07E-03  | Uncharacterized protein                                                                                       |
| O01532                                                                                               | asp-5         | 0,34            | -1,55        | 2,38E-03  | ASpartyl Protease                                                                                             |
| G5EEI4                                                                                               | asp-1         | 0,34            | -1,56        | 3,51E-09  | ASpartyl Protease                                                                                             |
| Q2XN18                                                                                               | spp-14        | 0,33            | -1,61        | 5,10E-05  | SaPosin-like Protein family                                                                                   |
| A0A0K3ARI2;Q9XUF9;U4PBX8                                                                             | C49C3.4       | 0,32            | -1,63        | 1,94E-03  | Uncharacterized protein                                                                                       |
| A0A0K3AVF2;O61874                                                                                    | dod-19        | 0,32            | -1,64        | 1,02E-06  | Downstream Of DAF-16 (Regulated by DAF-16)                                                                    |
| Q17038                                                                                               | col-143       | 0,29            | -1,78        | 1,43E-02  | COLlagen                                                                                                      |
| Q5WRM0;Q9XUT9                                                                                        | CELE_K06G5.1  | 0,27            | -1,86        | 1,83E-05  | Uncharacterized protein                                                                                       |
| Q45443                                                                                               | clec-65       | 0,18            | -2,46        | 3,64E-02  | C-type LECTin                                                                                                 |
| O01530                                                                                               | asp-6         | 0,14            | -2,88        | 5,05E-17  | Aspartic protease 6                                                                                           |

  

| UniProt ID    | Gene         | Lb21/OP 50 ratio | log2 (ratio) | Qvalue   | Protein description                 |
|---------------|--------------|------------------|--------------|----------|-------------------------------------|
| H2KZ06;H2KZ07 | clec-266     | 24,78            | 4,63         | 2,19E-10 | C-type LECTin                       |
| Q11174        | cht-1        | 13,52            | 3,76         | 1,83E-05 | Probable endochitinase              |
| Q22719;Q7JLZ9 | CELE_T24B8.3 | 9,29             | 3,22         | 1,71E-04 | Uncharacterized protein             |
| G5EE48        | ttr-50       | 8,23             | 3,16         | 1,25E-04 | TransThyretin-Related family domain |
| Q17572        | C01G6.3      | 8,47             | 3,08         | 1,30E-03 | Uncharacterized protein             |
| Q17334        | sodh-1       | 7,50             | 2,91         | 2,10E-30 | Alcohol dehydrogenase 1             |

| UniProt ID                                                                   | Gene                           | Lb21/OP<br>50 ratio | log2 (ratio) | Qvalue   | Protein description                                                       |
|------------------------------------------------------------------------------|--------------------------------|---------------------|--------------|----------|---------------------------------------------------------------------------|
| J7S164;J7SA65;P09588;Q27485                                                  | his-57;his-57;<br>his-3;his-35 | 6,12                | 2,61         | 1,83E-18 | Histone H2A                                                               |
| P04255;Q27484;Q27876;Q27894                                                  | his-11;his-41;<br>his-48;his-4 | 6,02                | 2,59         | 1,37E-20 | Histone H2B 1;Probable histone H2B 3;Probable histone H2B 4;Histone H2B 2 |
| G5EFP4                                                                       | sym-1                          | 5,82                | 2,54         | 8,73E-04 | SYM-1 protein                                                             |
| Q18693                                                                       | acs-2                          | 5,58                | 2,48         | 3,94E-05 | Fatty Acid CoA Synthetase family                                          |
| K7ZUH9;P08898;Q10453;Q9U281                                                  | his-40;his-2;<br>his-71;his-72 | 5,51                | 2,46         | 6,46E-07 | Histone H3;Histone H3;Histone H3.3 type 1; Histone H3.3 type 2            |
| Q9BL39                                                                       | swn-3                          | 5,37                | 2,43         | 1,50E-02 | SWI/SNF nucleosome remodeling complex component                           |
| P10771                                                                       | his-24                         | 5,37                | 2,42         | 4,00E-04 | Histone H1.1                                                              |
| D5MCQ1;D5MCQ2;D5MCQ3;D5MCQ5;D5MCQ6;D5MCQ7;D5MCQ9;D5MCR3;D5MCR4;Q21900;Q7JMB8 | sup-26                         | 5,35                | 2,42         | 1,20E-03 | SUPpressor                                                                |
| O45783                                                                       | CELE_T12D8.5                   | 5,29                | 2,40         | 1,79E-05 | Uncharacterized protein                                                   |
| A7DTF0;Q9XVW2                                                                | mrq-1                          | 4,97                | 2,31         | 2,69E-02 | MRG (Mortality factor-Related Gene) related                               |
| Q94051                                                                       | cav-1                          | 4,76                | 2,25         | 3,36E-03 | Caveolin-1                                                                |
| P62784                                                                       | his-1                          | 4,62                | 2,21         | 4,11E-16 | Histone H4                                                                |
| P42170                                                                       | rnr-2                          | 4,53                | 2,18         | 2,20E-04 | Ribonucleoside-diphosphate reductase small chain                          |
| Q19200                                                                       | sto-1                          | 4,37                | 2,13         | 5,21E-03 | Stomatatin-1                                                              |
| Q20684                                                                       | lec-2                          | 4,31                | 2,11         | 2,78E-17 | GaLECTin                                                                  |
| Q9N5F6                                                                       | CELE_R193.2                    | 4,25                | 2,09         | 3,84E-06 | Uncharacterized protein                                                   |
| Q27511                                                                       | htz-1                          | 4,09                | 2,03         | 6,32E-05 | Histone H2A.V                                                             |
| G5EEL9                                                                       | hmg-11                         | 4,05                | 2,02         | 8,10E-03 | HMG                                                                       |
| Q9XUR6                                                                       | CELE_T05E12.3                  | 3,95                | 1,98         | 4,58E-05 | Uncharacterized protein                                                   |
| Q967F4;Q967F4-2;Q967F4-3;Q967F4-4                                            | hmr-1                          | 3,66                | 1,87         | 3,61E-03 | Cadherin-related hmr-1;Isoform a, c, d of Cadherin-related hmr-1          |
| P34345                                                                       | gstt-1                         | 3,61                | 1,85         | 1,56E-03 | Glutathione transferase omega-1                                           |
| G5EFV4                                                                       | hmg-1.1                        | 3,56                | 1,83         | 6,47E-04 | HMG                                                                       |
| Q9XVS3                                                                       | clec-87                        | 3,36                | 1,75         | 2,54E-03 | C-type lectin domain-containing protein 87                                |
| O45577                                                                       | cpf-2                          | 3,13                | 1,64         | 8,39E-03 | Cleavage and Polyadenylation Factor                                       |
| G5EET2                                                                       | dut-1                          | 3,11                | 1,64         | 7,04E-03 | DeoxyUTPase                                                               |
| Q966L5                                                                       | E01A2.2                        | 3,10                | 1,63         | 7,35E-03 | Serrate RNA effector molecule homolog                                     |
| Q22492                                                                       | hex-1                          | 2,98                | 1,58         | 7,24E-18 | Beta-hexosaminidase A                                                     |
| A0A168H9W7;O61907;Q76NP4;Q86S28                                              | lin-40                         | 2,98                | 1,58         | 3,38E-02 | Uncharacterized protein                                                   |
| Q19537                                                                       | rpa-1                          | 2,88                | 1,53         | 4,58E-05 | Probable replication factor A 73 kDa subunit                              |
| Q9N363                                                                       | dcap-1                         | 2,85                | 1,51         | 4,63E-02 | mRNA DeCAPping enzyme                                                     |
| O17406                                                                       | atf-2                          | 2,81                | 1,49         | 8,73E-09 | AT hook Transcription Factor family                                       |
| G5EC23                                                                       | hcf-1                          | 2,81                | 1,49         | 1,47E-02 | HCF1 related                                                              |
| O01615                                                                       | T19H12.2                       | 2,76                | 1,46         | 3,83E-05 | Acidic leucine-rich nuclear phosphoprotein 32-related protein 2           |
| P90916                                                                       | lin-53                         | 2,75                | 1,46         | 1,20E-04 | Probable histone-binding protein lin-53                                   |
| Q4W4Y5;Q8MXD9                                                                | CELE_E02D9.1                   | 2,75                | 1,46         | 2,74E-05 | Uncharacterized protein                                                   |
| P91491                                                                       | CELE_T23B3.2                   | 2,74                | 1,45         | 7,09E-03 | Uncharacterized protein                                                   |
| O76725                                                                       | ctsa-2                         | 2,74                | 1,45         | 4,60E-02 | Carboxypeptidase                                                          |
| Q9N3F7                                                                       | CELE_Y53G8AR.9                 | 2,69                | 1,43         | 9,05E-03 | Uncharacterized protein                                                   |
| O17695                                                                       | hda-1                          | 2,69                | 1,43         | 4,21E-02 | Histone deacetylase 1                                                     |
| O17687                                                                       | nasp-2                         | 2,65                | 1,41         | 1,73E-22 | NASP (Human Nuclear Autoantigenic Sperm Protein) homolog                  |
| Q02482                                                                       | unc-37                         | 2,65                | 1,41         | 4,30E-02 | Transcription factor unc-37                                               |
| G5EGA6                                                                       | dhrs-4                         | 2,61                | 1,38         | 1,14E-03 | Dehydrogenase/reductase SDR family member 4                               |
| Q19326                                                                       | unc-85                         | 2,56                | 1,35         | 9,15E-04 | Probable histone chaperone asf-1                                          |
| H2KYN6;H2KYN7                                                                | smk-1                          | 2,53                | 1,34         | 2,80E-02 | SMEK (Dictyostelium Suppressor of MEK null) homolog                       |
| G1K0X0;Q1ZXU6;Q22655;Q22656                                                  | pgp-6;pgp-6;<br>pgp-7;pgp-6    | 2,50                | 1,32         | 2,58E-02 | p-GlycoProtein related                                                    |
| P91027                                                                       | chdp-1                         | 2,48                | 1,31         | 1,08E-11 | Calponin Homology Domain containing Protein                               |
| O01971                                                                       | emr-1                          | 2,41                | 1,27         | 1,30E-03 | Emerin homolog 1                                                          |
| Q94269                                                                       | CELE_K10C2.1                   | 2,41                | 1,27         | 2,05E-10 | Carboxypeptidase                                                          |
| G5EE72                                                                       | mrp-5                          | 2,39                | 1,26         | 2,50E-03 | Uncharacterized protein                                                   |
| Q18212                                                                       | hel-1                          | 2,36                | 1,24         | 2,33E-21 | Spliceosome RNA helicase DDX39B homolog                                   |
| O02115                                                                       | pcn-1                          | 2,29                | 1,19         | 6,58E-04 | Proliferating cell nuclear antigen                                        |
| Q9XVS2                                                                       | sup-46                         | 2,26                | 1,18         | 1,94E-03 | SUPpressor                                                                |
| P55853                                                                       | sno-1                          | 2,25                | 1,17         | 1,29E-07 | Small ubiquitin-related modifier                                          |
| O17626                                                                       | C31C9.2                        | 2,24                | 1,16         | 1,29E-13 | Uncharacterized protein                                                   |
| M1Z854;Q19286                                                                | ifb-2                          | 2,22                | 1,15         | 8,79E-14 | Intermediate Filament, B; Intermediate filament protein ifb-2             |
| Q21702                                                                       | CELE_R04B5.5                   | 2,21                | 1,15         | 1,02E-02 | Uncharacterized protein                                                   |
| G5EF87;H8ESF3                                                                | swn-1                          | 2,21                | 1,14         | 1,72E-04 | SWI/SNF nucleosome remodeling complex component                           |
| Q20790                                                                       | CELE_F54F7.3                   | 2,18                | 1,12         | 1,30E-02 | Uncharacterized protein                                                   |
| Q18599                                                                       | acer-1                         | 2,18                | 1,12         | 2,99E-24 | ACEtyl-CoA Regulator                                                      |
| Q9XX19                                                                       | mcm-2                          | 2,17                | 1,11         | 1,44E-02 | DNA helicase                                                              |
| Q10661                                                                       | dpy-30                         | 2,14                | 1,09         | 1,51E-02 | Dosage compensation protein dpy-30                                        |
| Q21443                                                                       | lmn-1                          | 2,13                | 1,09         | 5,02E-19 | Lamin-1                                                                   |
| Q9NA74                                                                       | CELE_Y57A10A.26                | 2,11                | 1,08         | 1,75E-05 | Uncharacterized protein                                                   |
| Q9XVR7                                                                       | mcm-3                          | 2,10                | 1,07         | 6,48E-05 | DNA helicase                                                              |
| Q965V4                                                                       | xpo-2                          | 2,10                | 1,07         | 8,01E-04 | EXPORTin (Nuclear export receptor)                                        |
| P34328                                                                       | hsp-12.2                       | 2,08                | 1,06         | 9,79E-05 | Heat shock protein Hsp-12.2                                               |
| G5EDQ4;G5EDV5;G5EF89;G5EGA4                                                  | cle-1                          | 2,07                | 1,05         | 6,06E-03 | CLE-1C protein;CLE-1B protein; CoLagens with Endostatin domain            |
| O45599                                                                       | cbd-1                          | 2,07                | 1,05         | 7,11E-06 | Chitin-binding domain protein cbd-1                                       |
| G5ECY0                                                                       | dlg-1                          | 2,06                | 1,04         | 9,05E-03 | Disks large homolog 1                                                     |
| Q22763                                                                       | nep-22                         | 2,04                | 1,03         | 1,71E-05 | NEPrllysin metallopeptidase family                                        |

| UniProt ID                                                     | Gene                                                                    | Lb21/OP<br>50 ratio | log2 (ratio) | Qvalue   | Protein description                                                                                               |
|----------------------------------------------------------------|-------------------------------------------------------------------------|---------------------|--------------|----------|-------------------------------------------------------------------------------------------------------------------|
| Q21832                                                         | rrp-4                                                                   | 2,03                | 1,02         | 3,90E-05 | RNA-binding protein 8A                                                                                            |
| D75F13                                                         | C02D5.4                                                                 | 2,02                | 1,01         | 5,43E-07 | Uncharacterized protein                                                                                           |
| Q9N4L9                                                         | CELE_ZK973.9                                                            | 2,01                | 1,01         | 2,30E-02 | Uncharacterized protein                                                                                           |
| H2KYV3;Q18076                                                  | C18B2.5                                                                 | 2,01                | 1,01         | 6,14E-04 | Uncharacterized protein                                                                                           |
| Q95Z16                                                         | ZK353.9                                                                 | 2,01                | 1,01         | 4,96E-02 | PITH domain-containing protein ZK353.9                                                                            |
| Q23463                                                         | eftu-2                                                                  | 2,01                | 1,00         | 2,71E-03 | Elongation Factor TU family                                                                                       |
| O44565                                                         | lam-1                                                                   | 1,98                | 0,99         | 1,24E-03 | LAMinin related. See also lmb                                                                                     |
| O76565                                                         | F13C5.5                                                                 | 1,98                | 0,99         | 1,84E-02 | Uncharacterized protein F13C5.5                                                                                   |
| Q18529                                                         | C39D10.7                                                                | 1,98                | 0,98         | 1,36E-12 | Uncharacterized protein                                                                                           |
| G5EBP5                                                         | CELE_ZC247.1                                                            | 1,97                | 0,98         | 1,67E-04 | Uncharacterized protein                                                                                           |
| Q20264                                                         | acs-11                                                                  | 1,97                | 0,98         | 9,05E-05 | Fatty Acid CoA Synthetase family                                                                                  |
| O16214                                                         | CELE_F17A9.4                                                            | 1,96                | 0,97         | 5,08E-04 | Uncharacterized protein                                                                                           |
| P49029                                                         | mag-1                                                                   | 1,96                | 0,97         | 4,55E-05 | Protein mago nashi homolog                                                                                        |
| Q18211                                                         | ran-3                                                                   | 1,95                | 0,97         | 2,13E-04 | Regulator of chromosome condensation                                                                              |
| Q21929                                                         | dhs-21                                                                  | 1,95                | 0,96         | 2,32E-07 | L-xylulose reductase                                                                                              |
| Q9BKP3;Q9UB28;Q9UB29                                           | let-805                                                                 | 1,94                | 0,96         | 3,86E-02 | Uncharacterized protein;Myotactin form B;Myotactin form A                                                         |
| O44444                                                         | C02B10.4                                                                | 1,94                | 0,95         | 6,38E-03 | Uncharacterized protein                                                                                           |
| O45405                                                         | exl-1                                                                   | 1,93                | 0,95         | 1,43E-02 | Chloride intracellular channel exl-1                                                                              |
| Q4R127                                                         | CELE_K11D12.13                                                          | 1,93                | 0,95         | 4,89E-02 | Uncharacterized protein                                                                                           |
| O17389                                                         | tth-1                                                                   | 1,92                | 0,94         | 5,11E-06 | Thymosin beta                                                                                                     |
| P34685                                                         | cap-1                                                                   | 1,91                | 0,94         | 7,99E-03 | F-actin-capping protein subunit alpha                                                                             |
| A0A0K3AXF6;Q9U2U0                                              | uaf-2                                                                   | 1,91                | 0,94         | 4,58E-03 | U2AF splicing factor                                                                                              |
| A0A131MBC3;A0A131MCY4;G5EER7;G5EG67                            | tag-10                                                                  | 1,91                | 0,93         | 1,76E-03 | Uncharacterized protein                                                                                           |
| O17915                                                         | ran-1                                                                   | 1,91                | 0,93         | 1,12E-05 | GTP-binding nuclear protein ran-1                                                                                 |
| Q10663                                                         | icl-1                                                                   | 1,91                | 0,93         | 2,65E-07 | Bifunctional glyoxylate cycle protein                                                                             |
| Q9NEW6                                                         | rsp-3                                                                   | 1,90                | 0,93         | 6,65E-03 | Probable splicing factor, arginine/serine-rich 3                                                                  |
| G5EBJ8;P05634;P53017;P53018;P53019;Q17856;Q18461;Q21244;Q23519 | CELE_Y59E9AR.1;msp-10;msp-19;msp-32;msp-33;msp-55;msp-49;msp-63;msp-152 | 1,89                | 0,92         | 1,17E-05 | Major sperm protein;Major sperm protein 10/36/56/76/19/31/40/45/50/51/53/59/61/65/81/113/14/32/33/55/57/49/63/152 |
| Q09665                                                         | tnc-2                                                                   | 1,88                | 0,91         | 2,23E-03 | Troponin C, isoform 2                                                                                             |
| Q9NLD1                                                         | hrp-2                                                                   | 1,87                | 0,91         | 5,55E-12 | HnRNP A1 homolog                                                                                                  |
| Q23614                                                         | CELE_ZK822.2                                                            | 1,87                | 0,91         | 2,72E-02 | Uncharacterized protein                                                                                           |
| O44985                                                         | teg-4                                                                   | 1,86                | 0,90         | 2,49E-02 | Tumorous Enhancer of Glp-1(Gf)                                                                                    |
| A9Z1L1;G5EBT3                                                  | srp-7                                                                   | 1,85                | 0,89         | 1,60E-03 | SeRPin                                                                                                            |
| P91423                                                         | CELE_T03F1.11                                                           | 1,85                | 0,89         | 1,79E-03 | Uncharacterized protein                                                                                           |
| Q10051                                                         | prp-19                                                                  | 1,84                | 0,88         | 2,36E-05 | Pre-mRNA-processing factor 19                                                                                     |
| Q20616                                                         | skpo-1                                                                  | 1,84                | 0,88         | 4,11E-04 | Peroxidase skpo-1                                                                                                 |
| Q18817                                                         | ben-1                                                                   | 1,84                | 0,88         | 9,79E-05 | Tubulin beta chain                                                                                                |
| Q9XUW5                                                         | ddx-17                                                                  | 1,83                | 0,87         | 2,24E-02 | DEAD box helicase homolog                                                                                         |
| G5EET8                                                         | pod-1.2                                                                 | 1,83                | 0,87         | 1,14E-06 | Protein Up-regulated in Daf-2(Gf)                                                                                 |
| G5ECR7                                                         | elb-1                                                                   | 1,82                | 0,87         | 4,56E-02 | ELongin B                                                                                                         |
| G5EE12                                                         | cash-1                                                                  | 1,81                | 0,86         | 3,81E-02 | CKA And Striatin Homolog                                                                                          |
| Q17886                                                         | nasp-1                                                                  | 1,80                | 0,85         | 2,65E-03 | NASP (Human Nuclear Autoantigenic Sperm Protein) homolog                                                          |
| P34556                                                         | cdk-1                                                                   | 1,80                | 0,85         | 6,83E-03 | Cyclin-dependent kinase 1                                                                                         |
| Q05062                                                         | cdc-42                                                                  | 1,79                | 0,84         | 1,03E-02 | Cell division control protein 42 homolog                                                                          |
| O61787                                                         | inx-16                                                                  | 1,78                | 0,83         | 2,19E-02 | Innexin-16                                                                                                        |
| P17343                                                         | gpb-1                                                                   | 1,77                | 0,82         | 1,59E-04 | Guanine nucleotide-binding protein subunit beta-1                                                                 |
| Q09967                                                         | egg-1                                                                   | 1,76                | 0,82         | 4,25E-02 | LDL receptor repeat-containing protein egg-1                                                                      |
| Q23089                                                         | xpo-1                                                                   | 1,75                | 0,81         | 4,95E-02 | EXPORTin (Nuclear export receptor)                                                                                |
| O76836;Q2V4T0                                                  | CELE_T19D12.4                                                           | 1,75                | 0,81         | 1,08E-03 | Uncharacterized protein                                                                                           |
| Q27249                                                         | lev-11                                                                  | 1,75                | 0,80         | 1,58E-07 | Tropomyosin isoforms c/e                                                                                          |
| G5EBK3                                                         | erm-1                                                                   | 1,74                | 0,80         | 4,37E-08 | ERM-1B                                                                                                            |
| Q20173                                                         | twf-2                                                                   | 1,74                | 0,80         | 7,68E-03 | TwinFilin actin binding protein homolog                                                                           |
| H9G2S0;Q19191                                                  | CELE_F08B12.4;F08B12.4                                                  | 1,74                | 0,80         | 1,20E-07 | Uncharacterized protein;Uncharacterized protein F08B12.4                                                          |
| Q69Z16                                                         | CELE_T12D8.10                                                           | 1,72                | 0,79         | 1,88E-02 | Uncharacterized protein                                                                                           |
| Q9U2F2                                                         | cpt-1                                                                   | 1,72                | 0,78         | 1,37E-03 | Carnitine Palmitoyl Transferase                                                                                   |
| O45812                                                         | CELE_T23G11.7                                                           | 1,72                | 0,78         | 4,99E-02 | Uncharacterized protein                                                                                           |
| G5EFE3                                                         | CELE_H03A11.2                                                           | 1,71                | 0,77         | 5,73E-09 | Uncharacterized protein                                                                                           |
| Q21763                                                         | CELE_R05H5.3                                                            | 1,71                | 0,77         | 2,69E-06 | Uncharacterized protein                                                                                           |
| Q9GZH2                                                         | ruvb-2                                                                  | 1,70                | 0,76         | 9,88E-03 | RuvB-like 2                                                                                                       |
| Q21295;Q9U3B9;Q9U3C1                                           | npp-1                                                                   | 1,69                | 0,76         | 5,00E-02 | Nuclear Pore complex Protein                                                                                      |
| G5ECV9                                                         | alh-3                                                                   | 1,69                | 0,76         | 1,99E-06 | 10-formyltetrahydrofolate dehydrogenase                                                                           |
| P34650                                                         | ZK632.4                                                                 | 1,69                | 0,76         | 5,92E-03 | Probable mannose-6-phosphate isomerase                                                                            |
| Q10020                                                         | T28D9.1                                                                 | 1,69                | 0,75         | 2,83E-02 | Uncharacterized protein T28D9.1                                                                                   |
| N1NTN5;Q17971                                                  | C14C10.5                                                                | 1,67                | 0,74         | 3,41E-02 | Uncharacterized protein                                                                                           |
| Q9XWP0                                                         | mrps-28                                                                 | 1,67                | 0,74         | 9,36E-03 | Mitochondrial Ribosomal Protein, Small                                                                            |
| K8ESM2                                                         | CELE_Y16B4A.2                                                           | 1,67                | 0,74         | 6,34E-03 | Carboxypeptidase                                                                                                  |
| P49595;Q8MNS3                                                  | F42G9.1;CELE_F42G9.1                                                    | 1,67                | 0,74         | 3,57E-02 | Probable protein phosphatase 2C F42G9.1;Uncharacterized protein                                                   |
| P12845                                                         | myo-2                                                                   | 1,67                | 0,74         | 1,75E-14 | Myosin-2                                                                                                          |
| Q20507                                                         | acbp-3                                                                  | 1,65                | 0,72         | 1,93E-03 | Acyl-CoA-binding protein homolog 3                                                                                |
| O17607                                                         | ruvb-1                                                                  | 1,65                | 0,72         | 3,23E-02 | RuvB-like 1                                                                                                       |
| Q22799                                                         | dlc-1                                                                   | 1,64                | 0,71         | 9,50E-06 | Dynein light chain 1, cytoplasmic                                                                                 |
| Q19459;Q19459-2                                                | F14E5.2                                                                 | 1,63                | 0,70         | 2,76E-02 | Golgi apparatus protein 1 homolog;Isoform b of Golgi apparatus protein 1 homolog                                  |
| Q20222;Q27GU2                                                  | lbp-3                                                                   | 1,63                | 0,70         | 1,07E-03 | Fatty acid-binding protein homolog 3;Lipid Binding Protein                                                        |
| G4SL51                                                         | pqn-52                                                                  | 1,63                | 0,70         | 1,43E-02 | Prion-like-(Q/N-rich)-domain-bearing protein                                                                      |
| Q9GPA1                                                         | CELE_F48E3.4                                                            | 1,62                | 0,70         | 1,44E-06 | Uncharacterized protein                                                                                           |
| Q5WRT8;Q5WRT9                                                  | npp-21                                                                  | 1,62                | 0,70         | 2,88E-02 | Nuclear Pore complex Protein                                                                                      |
| Q8MXS9;Q9N3S3;Q9N3S4                                           | rrp-6                                                                   | 1,62                | 0,70         | 4,05E-02 | RNP (RRM RNA binding domain) containing                                                                           |

| UniProt ID                                        | Gene                          | Lb21/OP 50 ratio | log2 (ratio) | Qvalue   | Protein description                                                                                                                        |
|---------------------------------------------------|-------------------------------|------------------|--------------|----------|--------------------------------------------------------------------------------------------------------------------------------------------|
| Q9TXH9                                            | ubxn-1                        | 1,62             | 0,70         | 3,03E-02 | UBX domain-containing protein 1                                                                                                            |
| O16297                                            | mcm-7                         | 1,62             | 0,69         | 1,36E-03 | DNA replication licensing factor MCM7                                                                                                      |
| G8XY6;Q23232                                      | wdr-4                         | 1,61             | 0,69         | 1,80E-05 | tRNA (guanine-N(7)-)-methyltransferase non-catalytic subunit                                                                               |
| P90900                                            | ifa-4                         | 1,61             | 0,69         | 1,58E-04 | Intermediate filament protein ifa-4                                                                                                        |
| A0A061AD21;A0A061AJ9;C1P640; C1P641;G5EEV6;Q21313 | epi-1                         | 1,61             | 0,68         | 4,47E-06 | Uncharacterized protein;Uncharacterized protein; Uncharacterized protein;Uncharacterized protein; Laminin alpha;Laminin-like protein epi-1 |
| Q20655                                            | fft-2                         | 1,61             | 0,68         | 1,07E-10 | 14-3-3-like protein 2                                                                                                                      |
| O01806                                            | ssb-1                         | 1,60             | 0,68         | 1,35E-02 | Sjogren Syndrome antigen B homolog                                                                                                         |
| Q9XTT9                                            | rpt-6                         | 1,60             | 0,68         | 7,95E-03 | Proteasome Regulatory Particle, ATPase-like                                                                                                |
| Q18100;Q4PIU9; Q53U86;Q53U87                      | sax-7                         | 1,59             | 0,67         | 3,13E-02 | Sensory AXon guidance;Sensory AXon guidance;SAX-7 SHORTFORM;SAX-7 LONGFORM                                                                 |
| Q9BI71;Q9BI72                                     | epn-1                         | 1,59             | 0,67         | 4,41E-02 | EPsIN (Endocytic protein) homolog                                                                                                          |
| Q95PZ7                                            | CELE_Y66D12A.9                | 1,59             | 0,67         | 1,79E-02 | Uncharacterized protein                                                                                                                    |
| Q22752                                            | dyrb-1                        | 1,58             | 0,66         | 1,74E-03 | Dynein light chain roadblock                                                                                                               |
| H2KZK7;Q965K3                                     | dpf-3                         | 1,57             | 0,66         | 3,42E-02 | Dipeptidyl Peptidase Four (IV) family                                                                                                      |
| Q03565                                            | baf-1                         | 1,57             | 0,65         | 3,17E-03 | Barrier-to-autointegration factor 1                                                                                                        |
| I2HAG1;Q09581;Q95Z14                              | lec-3                         | 1,57             | 0,65         | 4,93E-04 | Galectin;32 kDa beta-galactoside-binding lectin lec-3;Galectin                                                                             |
| Q9U1W8                                            | lsm-3                         | 1,57             | 0,65         | 2,88E-02 | LSM Sm-like protein                                                                                                                        |
| O44887                                            | inx-13                        | 1,55             | 0,63         | 1,35E-02 | Innexin                                                                                                                                    |
| P19826;Q8MPS2                                     | deb-1                         | 1,54             | 0,63         | 7,11E-06 | Vinculin;Dense Body                                                                                                                        |
| Q19775;Q19775-4; Q19775-5                         | ppm-1                         | 1,54             | 0,63         | 1,38E-04 | Protein phosphatase ppm-1;Isoform b of Protein phosphatase ppm-1;Isoform c of Protein phosphatase ppm-1                                    |
| Q9N3G0                                            | CELE_Y53G8AR.6                | 1,54             | 0,63         | 2,13E-02 | Uncharacterized protein                                                                                                                    |
| P90992                                            | misc-1                        | 1,54             | 0,63         | 9,91E-03 | Mitochondrial 2-oxoglutarate/malate carrier protein                                                                                        |
| Q9TYW1                                            | vha-19                        | 1,54             | 0,62         | 3,64E-03 | Vacuolar H ATPase                                                                                                                          |
| G5ECG8;G5EEC4; G5EFK7;G5EFW2                      | vab-10                        | 1,54             | 0,62         | 1,22E-07 | Uncharacterized protein;VAB-10A protein;Uncharacterized protein;Uncharacterized protein                                                    |
| O44781;Q9BL61                                     | CELE_F33D11.10; CELE_Y65B4A.6 | 1,54             | 0,62         | 7,86E-05 | Uncharacterized protein                                                                                                                    |
| G5EBF3                                            | puD-2.1                       | 1,54             | 0,62         | 7,56E-05 | Protein Up-regulated in Daf-2(Gf)                                                                                                          |
| G5EC91                                            | dpy-11                        | 1,53             | 0,61         | 4,32E-03 | DumPY: shorter than wild-type                                                                                                              |
| P34369                                            | prp-8                         | 1,52             | 0,61         | 5,23E-04 | Pre-mRNA-splicing factor 8 homolog                                                                                                         |
| P48727                                            | gsp-2                         | 1,52             | 0,61         | 1,19E-03 | Serine/threonine-protein phosphatase PP1-beta                                                                                              |
| Q09422                                            | pgam-5                        | 1,52             | 0,61         | 4,04E-02 | Serine/threonine-protein phosphatase Pgam5, mitochondrial                                                                                  |
| Q22037;Q22037-4                                   | hrp-1                         | 1,51             | 0,60         | 3,83E-05 | Heterogeneous nuclear ribonucleoprotein A1;Isoform d of Heterogeneous nuclear ribonucleoprotein A1                                         |
| G5EEL1;G5EFG1;G5EFL5                              | alp-1                         | 1,50             | 0,58         | 1,50E-03 | ALP/Enigma encoding                                                                                                                        |
| Q18823                                            | lam-2                         | 1,50             | 0,58         | 2,61E-05 | Laminin-like protein lam-2                                                                                                                 |
| Q11176                                            | unc-78                        | 1,50             | 0,58         | 6,36E-04 | Actin-interacting protein 1                                                                                                                |
| Q21284                                            | CELE_K07E3.4                  | 1,50             | 0,58         | 5,76E-09 | Uncharacterized protein                                                                                                                    |
| O01868                                            | rpl-24.1                      | 0,67             | -0,58        | 5,78E-03 | 60S ribosomal protein L24                                                                                                                  |
| B7WNA0                                            | pyk-1                         | 0,67             | -0,58        | 8,06E-11 | Pyruvate kinase                                                                                                                            |
| O61790                                            | R12E2.11                      | 0,67             | -0,59        | 1,63E-02 | Orotate phosphoribosyltransferase                                                                                                          |
| Q21770                                            | wago-1                        | 0,66             | -0,59        | 3,23E-04 | Argonaute protein wago-1                                                                                                                   |
| H2L0M0;Q9GZ13                                     | pod-2                         | 0,66             | -0,60        | 2,27E-02 | Uncharacterized protein                                                                                                                    |
| O44512                                            | isp-1                         | 0,66             | -0,60        | 2,92E-03 | Cytochrome b-c1 complex subunit Rieske, mitochondrial                                                                                      |
| Q7Z1Q3                                            | alh-12                        | 0,66             | -0,60        | 7,37E-08 | Aldehyde dehydrogenase                                                                                                                     |
| O02089                                            | msra-1                        | 0,65             | -0,62        | 1,21E-04 | Methionine Sulfoxide Reductase A                                                                                                           |
| G5EDZ7                                            | cdr-4                         | 0,65             | -0,63        | 6,21E-03 | CaDmium Responsive                                                                                                                         |
| O61235                                            | ctl-1                         | 0,64             | -0,64        | 4,36E-09 | Catalase-2                                                                                                                                 |
| O17622                                            | C29F7.3                       | 0,64             | -0,64        | 2,15E-02 | UMP-CMP kinase 1                                                                                                                           |
| Q10121                                            | C23G10.2                      | 0,64             | -0,65        | 2,55E-02 | RutC family protein C23G10.2                                                                                                               |
| O02108;Q336L8                                     | cdc-37                        | 0,63             | -0,66        | 4,13E-02 | Probable Hsp90 co-chaperone cdc37;Cell Division Cycle related                                                                              |
| G5ED31;G5EDD1                                     | ucr-2.1                       | 0,63             | -0,67        | 4,58E-05 | Ubiquinol-Cytochrome c oxidoreductase complex                                                                                              |
| Q8MXI1                                            | ucr-11                        | 0,62             | -0,68        | 2,20E-03 | Ubiquinol-Cytochrome c oxidoreductase complex                                                                                              |
| Q9XWU9                                            | CELE_Y37D8A.19                | 0,62             | -0,69        | 9,43E-04 | Uncharacterized protein                                                                                                                    |
| Q9XVF7                                            | rpl-2                         | 0,62             | -0,69        | 6,88E-06 | 60S ribosomal protein L8                                                                                                                   |
| Q9XW17                                            | car-1                         | 0,62             | -0,69        | 4,11E-11 | Cytokinesis, Apoptosis, RNA-associated                                                                                                     |
| Q9N5E4                                            | CELE_T02H6.11                 | 0,62             | -0,70        | 5,33E-04 | Uncharacterized protein                                                                                                                    |
| Q09975                                            | lys-8                         | 0,62             | -0,70        | 3,42E-02 | LYsozyme                                                                                                                                   |
| P53585                                            | acly-1                        | 0,62             | -0,70        | 1,01E-03 | Probable ATP-citrate synthase                                                                                                              |
| Q9XXR4                                            | ttr-24                        | 0,62             | -0,70        | 2,25E-04 | TransThyretin-Related family domain                                                                                                        |
| C1P622;Q09517;S6FCZ1                              | let-767                       | 0,61             | -0,72        | 1,47E-04 | Uncharacterized protein;Very-long-chain 3-oxoacyl-coA reductase let-767;Uncharacterized protein                                            |
| G5EET3                                            | cdr-6                         | 0,61             | -0,72        | 1,20E-02 | CaDmium Responsive                                                                                                                         |
| Q9N4D8                                            | nlp-40                        | 0,61             | -0,72        | 3,67E-02 | Neuropeptide-like peptides nlp-40                                                                                                          |
| O62146                                            | F09B12.3                      | 0,61             | -0,72        | 9,41E-03 | Putative phospholipase B-like 2                                                                                                            |
| C6KRL2                                            | CELE_F23D12.11                | 0,60             | -0,73        | 3,00E-02 | Uncharacterized protein                                                                                                                    |
| Q23068                                            | CELE_W01A11.1                 | 0,60             | -0,73        | 4,07E-05 | Epoxide hydrolase                                                                                                                          |
| A5JYX5-2                                          | dhs-3                         | 0,60             | -0,74        | 5,33E-07 | Isoform a of Protein dhs-3                                                                                                                 |
| H2KZG6                                            | acdh-1                        | 0,59             | -0,75        | 2,99E-02 | Acyl CoA Dehydrogenase                                                                                                                     |
| Q44400                                            | F37C4.5                       | 0,59             | -0,75        | 6,89E-31 | Protein F37C4.5                                                                                                                            |
| G5EEH6                                            | ivd-1                         | 0,59             | -0,76        | 5,61E-06 | Isovaleryl-CoA dehydrogenase                                                                                                               |
| Q18853                                            | cyc-1                         | 0,59             | -0,77        | 3,91E-04 | Cytochrome C                                                                                                                               |
| Q9GUF2                                            | acp-6                         | 0,59             | -0,77        | 2,56E-09 | ACid Phosphatase family                                                                                                                    |
| P34559                                            | ech-6                         | 0,59             | -0,77        | 1,13E-13 | Probable enoyl-CoA hydratase, mitochondrial                                                                                                |
| G5ECT2                                            | CELE_F15E6.3                  | 0,58             | -0,79        | 2,80E-02 | RNA binding protein                                                                                                                        |
| O18000                                            | pes-9                         | 0,58             | -0,79        | 2,74E-07 | Patterned Expression Site                                                                                                                  |
| O17271                                            | heh-1                         | 0,57             | -0,80        | 1,07E-03 | Putative protein heh-1                                                                                                                     |
| Q22968                                            | gcst-1                        | 0,57             | -0,80        | 2,83E-06 | Aminomethyltransferase                                                                                                                     |

| UniProt ID                                                           | Gene            | Lb21/OP 50 ratio | log2 (ratio) | Qvalue   | Protein description                                                                               |
|----------------------------------------------------------------------|-----------------|------------------|--------------|----------|---------------------------------------------------------------------------------------------------|
| O17680                                                               | sams-1          | 0,57             | -0,80        | 3,98E-19 | Probable S-adenosylmethionine synthase 1                                                          |
| Q9Y041                                                               | hgo-1           | 0,57             | -0,81        | 9,86E-04 | Homogentisate 1,2-dioxygenase                                                                     |
| P54688                                                               | bcat-1          | 0,57             | -0,81        | 3,12E-02 | Branched-chain-amino-acid aminotransferase, cytosolic                                             |
| Q21962;Q86LS6                                                        | gldc-1          | 0,57             | -0,81        | 1,33E-06 | Glycine cleavage system P protein                                                                 |
| Q22993                                                               | pmt-2           | 0,57             | -0,81        | 1,84E-11 | Phosphoethanolamine MethylTransferase                                                             |
| Q20829                                                               | aman-1          | 0,57             | -0,82        | 1,22E-02 | Alpha-mannosidase                                                                                 |
| P34466                                                               | clu-1           | 0,57             | -0,82        | 1,07E-03 | Clustered mitochondria protein homolog                                                            |
| Q17339                                                               | gld-1           | 0,56             | -0,83        | 4,31E-02 | Female germline-specific tumor suppressor gld-1                                                   |
| P52713                                                               | alh-8           | 0,56             | -0,83        | 1,26E-16 | Probable methylmalonate-semialdehyde dehydrogenase [acylating], mitochondrial                     |
| Q18683                                                               | C47E12.2        | 0,56             | -0,84        | 4,98E-02 | Uncharacterized protein                                                                           |
| Q9U2M4                                                               | hphd-1          | 0,56             | -0,84        | 2,27E-11 | Hydroxyacid-oxoacid transhydrogenase, mitochondrial                                               |
| A0A0K3ASN4;A0A0K3AT80;A0A0K3AVI4;A0A0K3AW96;A0A0K3AY11;D0VWL6;D0VWL7 | fln-2           | 0,55             | -0,86        | 2,46E-02 | FILaminI (Actin binding protein) homolog                                                          |
| Q19278;Q8MNT7                                                        | hach-1          | 0,55             | -0,87        | 7,23E-12 | 3-hydroxyisobutyryl-CoA hydrolase, mitochondrial;3-hydroxyisobutyryl-CoA hydrolase, mitochondrial |
| G5EGP8                                                               | cpz-1           | 0,54             | -0,89        | 4,46E-05 | CathePsin Z                                                                                       |
| Q5WRM0;Q9XUT9                                                        | CELE_K06G5.1    | 0,54             | -0,90        | 7,86E-03 | Uncharacterized protein                                                                           |
| Q8IG67                                                               | let-611         | 0,54             | -0,90        | 4,08E-02 | Uncharacterized protein                                                                           |
| Q09652                                                               | gstk-1          | 0,53             | -0,91        | 2,34E-02 | Glutathione S-transferase kappa 1                                                                 |
| Q9NAB4                                                               | gst-26          | 0,53             | -0,91        | 4,32E-02 | Glutathione S-Transferase                                                                         |
| E9P851                                                               | mctp-1          | 0,53             | -0,92        | 1,13E-02 | Multiple C2 and Transmembrane region Protein family homolog                                       |
| P34383                                                               | far-2           | 0,53             | -0,92        | 1,06E-65 | Fatty-acid and retinol-binding protein 2                                                          |
| Q22633                                                               | hpd-1           | 0,52             | -0,93        | 5,02E-06 | 4-hydroxyphenylpyruvate dioxygenase                                                               |
| Q19246                                                               | dhs-25          | 0,52             | -0,93        | 1,24E-04 | DeHydrogenases, Short chain                                                                       |
| P18948;P18948-2                                                      | vit-6           | 0,52             | -0,94        | 0,00E+00 | Vitellogenin-6;Isoform a of Vitellogenin-6                                                        |
| P24890                                                               | ctb-1           | 0,51             | -0,97        | 4,54E-02 | Cytochrome b                                                                                      |
| Q9N4X8                                                               | gst-10          | 0,51             | -0,97        | 2,10E-04 | Glutathione S-transferase P 10                                                                    |
| P43508                                                               | cpr-4           | 0,51             | -0,98        | 1,38E-03 | Cathepsin B-like cysteine proteinase 4                                                            |
| G5EDV7                                                               | CELE_Y53H1B.2   | 0,51             | -0,98        | 2,62E-03 | Uncharacterized protein                                                                           |
| P34689                                                               | glh-1           | 0,51             | -0,98        | 5,39E-12 | ATP-dependent RNA helicase glh-1                                                                  |
| Q19876                                                               | thn-2           | 0,50             | -1,00        | 9,27E-04 | THaumatIN family                                                                                  |
| Q9NAB3                                                               | gst-27          | 0,50             | -1,00        | 2,10E-02 | Glutathione S-Transferase                                                                         |
| Q17345                                                               | ttr-6           | 0,50             | -1,01        | 1,13E-04 | TransThyretin-Related family domain                                                               |
| Q20898                                                               | ifet-1          | 0,49             | -1,02        | 4,32E-02 | Translational repressor ifet-1                                                                    |
| A0A0K3AVF2;O61874                                                    | dod-19          | 0,49             | -1,02        | 2,18E-03 | Downstream Of DAF-16 (Regulated by DAF-16)                                                        |
| Q22768                                                               | CELE_T25B9.1    | 0,49             | -1,04        | 2,22E-03 | Uncharacterized protein                                                                           |
| Q9N585                                                               | ppw-2           | 0,48             | -1,05        | 8,93E-03 | Piwi-like protein                                                                                 |
| Q22814                                                               | gst-13          | 0,48             | -1,07        | 1,78E-02 | Glutathione S-Transferase                                                                         |
| Q95YF3                                                               | cgh-1           | 0,47             | -1,08        | 6,78E-28 | ATP-dependent RNA helicase cgh-1                                                                  |
| I2HA98;P90925                                                        | pah-1           | 0,46             | -1,11        | 5,25E-06 | Phenylalanine Hydroxylase;Probable phenylalanine-4-hydroxylase 1                                  |
| Q18938                                                               | gst-42          | 0,46             | -1,12        | 3,71E-02 | Probable maleylacetoacetate isomerase                                                             |
| G5EC10                                                               | lec-9           | 0,45             | -1,15        | 6,02E-09 | Galectin                                                                                          |
| Q18040                                                               | oatr-1          | 0,45             | -1,16        | 3,40E-16 | Probable ornithine aminotransferase, mitochondrial                                                |
| O44503;U4PFH6                                                        | aass-1          | 0,44             | -1,17        | 1,05E-03 | AminoAdipate-Semialdehyde Synthase homolog                                                        |
| G5ECL3                                                               | prp-21          | 0,44             | -1,19        | 1,16E-02 | Pre-RNA processing 21                                                                             |
| P91398                                                               | cey-3           | 0,43             | -1,21        | 4,84E-05 | C. Elegans Y-box                                                                                  |
| Q23044                                                               | CELE_T22B7.7    | 0,43             | -1,23        | 2,64E-03 | Uncharacterized protein                                                                           |
| Q93315                                                               | cytb-5.1        | 0,42             | -1,26        | 8,51E-03 | YTochrome B                                                                                       |
| Q20615                                                               | dod-23          | 0,40             | -1,30        | 4,97E-02 | Downstream Of DAF-16 (Regulated by DAF-16)                                                        |
| Q2XN18                                                               | spp-14          | 0,40             | -1,34        | 8,49E-04 | SaPosin-like Protein family                                                                       |
| P19974                                                               | cyc-2.1         | 0,39             | -1,34        | 1,46E-06 | Cytochrome c 2.1                                                                                  |
| O45346                                                               | osm-11          | 0,39             | -1,36        | 3,13E-06 | Uncharacterized protein                                                                           |
| Q19478                                                               | far-3           | 0,39             | -1,37        | 3,25E-16 | Fatty Acid/Retinol binding protein                                                                |
| P91306                                                               | cey-2           | 0,38             | -1,41        | 1,99E-11 | C. Elegans Y-box                                                                                  |
| Q9U3Q6                                                               | ugt-22          | 0,38             | -1,41        | 1,29E-02 | UDP-glucuronosyltransferase                                                                       |
| Q19699                                                               | gfat-2          | 0,37             | -1,43        | 4,43E-06 | Glutamine-Fructose 6-phosphate AminoTransferase homolog                                           |
| Q19130;Q95QM8                                                        | gfat-1          | 0,37             | -1,44        | 1,62E-03 | Glutamine-Fructose 6-phosphate AminoTransferase homolog                                           |
| Q9N384                                                               | lec-6           | 0,37             | -1,45        | 4,73E-16 | Galectin                                                                                          |
| Q21750                                                               | aagr-2          | 0,36             | -1,46        | 1,23E-02 | Acid Alpha Glucosidase Relate                                                                     |
| Q18026                                                               | flu-2           | 0,36             | -1,49        | 5,72E-10 | Kynureninase                                                                                      |
| P55956                                                               | asp-3           | 0,35             | -1,50        | 5,77E-04 | Aspartic protease 3                                                                               |
| Q9BL43                                                               | CELE_Y71H2AM.13 | 0,35             | -1,53        | 8,51E-05 | Uncharacterized protein                                                                           |
| P43510;Q8MQC6                                                        | cpr-6           | 0,34             | -1,56        | 5,19E-13 | Cathepsin B-like cysteine proteinase 6;Cysteine PRotase related                                   |
| O17038                                                               | col-143         | 0,34             | -1,57        | 3,73E-02 | COLlagen                                                                                          |
| O02215                                                               | cbl-1           | 0,31             | -1,68        | 3,14E-02 | Cystathionine Beta Lyase                                                                          |
| O01530                                                               | asp-6           | 0,28             | -1,85        | 3,43E-13 | Aspartic protease 6                                                                               |
| Q09486                                                               | C30G12.2        | 0,27             | -1,89        | 8,88E-03 | Uncharacterized protein                                                                           |
| Q09365                                                               | ZK1320.3        | 0,26             | -1,93        | 1,70E-02 | Uncharacterized protein ZK1320.3                                                                  |
| H2KZV5                                                               | CELE_T21H3.1    | 0,26             | -1,96        | 1,01E-04 | Uncharacterized protein                                                                           |
| P34528                                                               | K12H4.7         | 0,25             | -1,99        | 1,38E-02 | Putative serine protease K12H4.7                                                                  |
| P90889                                                               | CELE_F55H12.4   | 0,24             | -2,07        | 8,00E-08 | Uncharacterized protein                                                                           |
| O01532                                                               | asp-5           | 0,24             | -2,08        | 4,24E-03 | ASpartyl Protease                                                                                 |
| P55155                                                               | vit-1           | 0,24             | -2,08        | 5,72E-11 | Vitellogenin-1                                                                                    |
| P46562                                                               | alh-9           | 0,23             | -2,09        | 1,63E-38 | Putative aldehyde dehydrogenase family 7 member A1 homolog                                        |
| Q7YTR9                                                               | C27B7.9         | 0,23             | -2,11        | 8,60E-04 | Uncharacterized protein                                                                           |

| UniProt ID | Gene         | Lb21/OP 50 ratio | log2 (ratio) | Qvalue    | Protein description                  |
|------------|--------------|------------------|--------------|-----------|--------------------------------------|
| G5EEI4     | asp-1        | 0,22             | -2,16        | 1,42E-08  | ASpartyl Protease                    |
| Q86NE0     | asp-2        | 0,20             | -2,30        | 3,52E-07  | ASpartyl Protease                    |
| Q20950     | CELE_F57F5.1 | 0,20             | -2,35        | 9,24E-03  | Uncharacterized protein              |
| P55216     | cth-2        | 0,18             | -2,43        | 2,99E-04  | Putative cystathionine gamma-lyase 2 |
| P06125     | vit-5        | 0,13             | -2,96        | 5,03E-61  | Vitellogenin-5                       |
| Q86FL8     | spp-5        | 0,13             | -2,97        | 1,69E-06  | SaPosin-like Protein family          |
| P18947     | vit-4        | 0,10             | -3,29        | 8,72E-299 | Vitellogenin-4                       |
| Q9N4J2     | vit-3        | 0,10             | -3,30        | 2,13E-04  | Vitellogenin-3                       |
| O01467     | C04E6.5      | 0,09             | -3,51        | 2,66E-02  | Uncharacterized protein              |
| O17725     | CELE_D1086.3 | 0,08             | -3,58        | 1,07E-02  | Uncharacterized protein              |

| UniProt ID                                                                   | Gene                       | Lb23/OP 50 ratio | log2 (ratio) | Qvalue   | Protein description                                                       |
|------------------------------------------------------------------------------|----------------------------|------------------|--------------|----------|---------------------------------------------------------------------------|
| H2KZ06;H2KZ07                                                                | clec-266                   | 19,02            | 4,25         | 3,89E-11 | C-type LECTin                                                             |
| Q11174                                                                       | cht-1                      | 16,46            | 4,04         | 1,16E-05 | Probable endochitinase                                                    |
| G5EE48                                                                       | ttr-50                     | 8,54             | 3,09         | 1,08E-04 | Trans Thyretin-Related family domain                                      |
| Q22719;Q7JLZ9                                                                | CELE_T24B8.3               | 8,35             | 3,06         | 3,96E-04 | Uncharacterized protein                                                   |
| Q17572                                                                       | C01G6.3                    | 7,48             | 2,90         | 1,37E-03 | Uncharacterized protein                                                   |
| D5MCQ1;D5MCQ2;D5MCQ3;D5MCQ5;D5MCQ6;D5MCQ7;D5MCQ9;D5MCR3;D5MCR4;Q21900;Q7JMB8 | sup-26                     | 6,51             | 2,70         | 3,38E-04 | SUPpressor                                                                |
| Q9N5F6                                                                       | CELE_R193.2                | 6,14             | 2,62         | 1,93E-07 | Uncharacterized protein                                                   |
| P04255;Q27484;Q27876;Q27894                                                  | his-11;his-41;his-48;his-4 | 5,95             | 2,57         | 1,01E-16 | Histone H2B 1;Probable histone H2B 3;Probable histone H2B 4;Histone H2B 2 |
| J7S164;J7SA65;P09588;Q27485                                                  | his-57;his-57;his-3;his-35 | 5,68             | 2,51         | 1,97E-15 | Histone H2A                                                               |
| Q20684                                                                       | lec-2                      | 5,50             | 2,46         | 8,60E-22 | GalLECTin                                                                 |
| P10771                                                                       | his-24                     | 5,45             | 2,45         | 2,98E-04 | Histone H1.1                                                              |
| Q967F4;Q967F4-2;Q967F4-3;Q967F4-4                                            | hmr-1                      | 5,19             | 2,38         | 1,88E-02 | Cadherin-related hmr-1;Isoform a, c, d of Cadherin-related hmr-1          |
| Q19200                                                                       | sto-1                      | 5,14             | 2,36         | 5,78E-03 | Stomatin-1                                                                |
| Q94051                                                                       | cav-1                      | 5,00             | 2,32         | 4,71E-03 | Caveolin-1                                                                |
| K7ZUH9;P08898;Q10453;Q9U281                                                  | his-40;his-2;his-71;his-72 | 4,97             | 2,31         | 2,68E-08 | Histone H3;Histone H3;Histone H3.3 type 1;Histone H3.3 type 2             |
| Q9BL39                                                                       | swn-3                      | 4,82             | 2,27         | 3,11E-02 | SWI/SNF nucleosome remodeling complex component                           |
| A0A131MBC3;A0A131MCY4;G5EER7;G5EG67                                          | tag-10                     | 4,64             | 2,21         | 7,09E-05 | Uncharacterized protein                                                   |
| A7DTF0;Q9XWWW2                                                               | mrg-1                      | 4,57             | 2,19         | 1,94E-02 | MRG (Mortality factor-Related Gene) related                               |
| Q17334                                                                       | sodh-1                     | 4,43             | 2,15         | 1,43E-22 | Alcohol dehydrogenase 1                                                   |
| O76725                                                                       | ctsa-2                     | 4,35             | 2,12         | 2,20E-02 | Carboxypeptidase                                                          |
| G5EC23                                                                       | hcf-1                      | 4,33             | 2,11         | 4,96E-02 | HCF1 related                                                              |
| P42170                                                                       | rnr-2                      | 4,12             | 2,04         | 7,79E-04 | Ribonucleoside-diphosphate reductase small chain                          |
| O76836;Q2V4T0                                                                | CELE_T19D12.4              | 4,12             | 2,04         | 1,10E-06 | Uncharacterized protein                                                   |
| G5EFP4                                                                       | sym-1                      | 3,99             | 2,00         | 1,40E-03 | SYM-1 protein                                                             |
| P62784                                                                       | his-1                      | 3,88             | 1,96         | 7,29E-12 | Histone H4                                                                |
| M1Z854;Q19286                                                                | ifb-2                      | 3,87             | 1,95         | 4,14E-21 | Intermediate Filament, B;Intermediate filament protein ifb-2              |
| Q27511                                                                       | htz-1                      | 3,73             | 1,90         | 1,75E-04 | Histone H2A.V                                                             |
| Q966L5                                                                       | E01A2.2                    | 3,71             | 1,89         | 4,56E-03 | Serrate RNA effector molecule homolog                                     |
| Q9XUR6                                                                       | CELE_T05E12.3              | 3,67             | 1,88         | 8,19E-05 | Uncharacterized protein                                                   |
| P91491                                                                       | CELE_T23B3.2               | 3,66             | 1,87         | 5,69E-03 | Uncharacterized protein                                                   |
| O45783                                                                       | CELE_T12D8.5               | 3,58             | 1,84         | 2,63E-06 | Uncharacterized protein                                                   |
| Q9BIB7                                                                       | hrpf-1                     | 3,57             | 1,84         | 2,77E-02 | HnRNP F homolog                                                           |
| G5EFV4                                                                       | hmg-1.1                    | 3,54             | 1,82         | 1,36E-03 | HMG                                                                       |
| Q95Y97                                                                       | rpa-2                      | 3,44             | 1,78         | 6,24E-03 | Replication Protein A homolog                                             |
| O18693                                                                       | acs-2                      | 3,38             | 1,76         | 2,64E-04 | Fatty Acid CoA Synthetase family                                          |
| O45444                                                                       | clec-63                    | 3,37             | 1,75         | 1,41E-16 | C-type LECTin                                                             |
| G5EEL9                                                                       | hmg-11                     | 3,34             | 1,74         | 2,00E-02 | HMG                                                                       |
| Q22763                                                                       | nep-22                     | 3,33             | 1,73         | 4,16E-08 | NEPrilysin metalloproteinase family                                       |
| Q9XVS3                                                                       | clec-87                    | 3,31             | 1,73         | 2,00E-02 | C-type lectin domain-containing protein 87                                |
| O17406                                                                       | atf-2                      | 3,31             | 1,73         | 9,52E-09 | AT hook Transcription Factor family                                       |
| Q9N3F7                                                                       | CELE_Y53G8AR.9             | 3,19             | 1,67         | 9,06E-03 | Uncharacterized protein                                                   |
| O44985                                                                       | teg-4                      | 3,17             | 1,66         | 8,26E-03 | Tumorous Enhancer of Glp-1(Gf)                                            |
| G5EET2                                                                       | dut-1                      | 3,10             | 1,63         | 4,04E-03 | DeoxyUTPase                                                               |
| O76672                                                                       | CELE_H34I24.2              | 3,03             | 1,60         | 4,89E-02 | Uncharacterized protein                                                   |
| P91027                                                                       | chdp-1                     | 2,94             | 1,56         | 3,28E-13 | Calponin Homology Domain containing Protein                               |
| Q09967                                                                       | egg-1                      | 2,87             | 1,52         | 3,55E-02 | LDL receptor repeat-containing protein egg-1                              |
| O45405                                                                       | exl-1                      | 2,86             | 1,52         | 1,62E-02 | Chloride intracellular channel exl-1                                      |
| P90916                                                                       | lin-53                     | 2,85             | 1,51         | 2,41E-04 | Probable histone-binding protein lin-53                                   |
| O01615                                                                       | T19H12.2                   | 2,85             | 1,51         | 6,06E-05 | Acidic leucine-rich nuclear phosphoprotein 32-related protein 2           |
| Q94269                                                                       | CELE_K10C2.1               | 2,83             | 1,50         | 2,34E-11 | Carboxypeptidase                                                          |
| Q4W4Y5;Q8MXD9                                                                | CELE_E02D9.1               | 2,83             | 1,50         | 2,37E-06 | Uncharacterized protein                                                   |
| A0A168H9W7;O61907;Q76NP4;Q86S28                                              | lin-40                     | 2,80             | 1,49         | 4,21E-02 | Uncharacterized protein                                                   |
| G5EGA6                                                                       | dhrs-4                     | 2,79             | 1,48         | 1,42E-04 | Dehydrogenase/reductase SDR family member 4                               |
| Q19537                                                                       | rpa-1                      | 2,79             | 1,48         | 6,36E-06 | Probable replication factor A 73 kDa subunit                              |
| Q9N363                                                                       | dcap-1                     | 2,74             | 1,45         | 8,44E-03 | mRNA DeCAPping enzyme                                                     |
| P34345                                                                       | gst-1                      | 2,69             | 1,43         | 1,18E-02 | Glutathione transferase omega-1                                           |
| Q9NA74                                                                       | CELE_Y57A10A.26            | 2,66             | 1,41         | 2,80E-08 | Uncharacterized protein                                                   |
| Q19326                                                                       | unc-85                     | 2,64             | 1,40         | 8,56E-03 | Probable histone chaperone asf-1                                          |
| P34328                                                                       | hsp-12.2                   | 2,60             | 1,38         | 6,90E-07 | Heat shock protein Hsp-12.2                                               |
| P91423                                                                       | CELE_T03F1.11              | 2,60             | 1,38         | 4,53E-05 | Uncharacterized protein                                                   |
| O17687                                                                       | nasp-2                     | 2,54             | 1,35         | 8,01E-21 | NASP (Human Nuclear Autoantigenic Sperm Protein) homolog                  |

| UniProt ID                                                                                                             | Gene                                                                    | Lb23/OP 50 ratio | log2 (ratio) | Qvalue   | Protein description                                                                                                                           |
|------------------------------------------------------------------------------------------------------------------------|-------------------------------------------------------------------------|------------------|--------------|----------|-----------------------------------------------------------------------------------------------------------------------------------------------|
| O02482                                                                                                                 | unc-37                                                                  | 2,54             | 1,34         | 7,26E-03 | Transcription factor unc-37                                                                                                                   |
| Q9N4L9                                                                                                                 | CELE_ZK973.9                                                            | 2,51             | 1,33         | 1,90E-02 | Uncharacterized protein                                                                                                                       |
| G5EF87;H8ESF3                                                                                                          | swn-1                                                                   | 2,51             | 1,32         | 1,57E-04 | SWI/SNF nucleosome remodeling complex component                                                                                               |
| G5EE72                                                                                                                 | mrp-5                                                                   | 2,50             | 1,32         | 3,75E-03 | Uncharacterized protein                                                                                                                       |
| Q19555                                                                                                                 | scc-3                                                                   | 2,50             | 1,32         | 1,69E-02 | Cohesin subunit scc-3                                                                                                                         |
| O17626                                                                                                                 | C31C9.2                                                                 | 2,48             | 1,31         | 5,08E-15 | Uncharacterized protein                                                                                                                       |
| Q18212                                                                                                                 | hel-1                                                                   | 2,46             | 1,30         | 1,38E-17 | Spliceosome RNA helicase DDX39B homolog                                                                                                       |
| Q20790                                                                                                                 | CELE_F54F7.3                                                            | 2,43             | 1,28         | 9,29E-03 | Uncharacterized protein                                                                                                                       |
| Q27249                                                                                                                 | lev-11                                                                  | 2,41             | 1,27         | 3,63E-08 | Tropomyosin isoforms c/e                                                                                                                      |
| Q09936                                                                                                                 | C53C9.2                                                                 | 2,37             | 1,24         | 3,53E-02 | Uncharacterized protein C53C9.2                                                                                                               |
| O61787                                                                                                                 | inx-16                                                                  | 2,37             | 1,24         | 3,64E-02 | Innexin-16                                                                                                                                    |
| Q19782                                                                                                                 | ifd-2                                                                   | 2,37             | 1,24         | 8,63E-05 | Intermediate filament protein ifd-2                                                                                                           |
| Q9BKP3;Q9UB28;Q9UB29                                                                                                   | let-805                                                                 | 2,36             | 1,24         | 3,57E-02 | Uncharacterized protein;Myotactin form B;Myotactin form A                                                                                     |
| Q9XVS2                                                                                                                 | sup-46                                                                  | 2,34             | 1,23         | 1,75E-04 | SUPpressor                                                                                                                                    |
| O02115                                                                                                                 | pcn-1                                                                   | 2,34             | 1,23         | 5,24E-04 | Proliferating cell nuclear antigen                                                                                                            |
| Q10661                                                                                                                 | dpv-30                                                                  | 2,34             | 1,23         | 3,13E-03 | Dosage compensation protein dpv-30                                                                                                            |
| Q7JKP2;Q9U362                                                                                                          | pgm-1                                                                   | 2,33             | 1,22         | 2,23E-02 | ProGRaNullin homolog                                                                                                                          |
| Q21443                                                                                                                 | lmn-1                                                                   | 2,33             | 1,22         | 2,24E-31 | Lamin-1                                                                                                                                       |
| O01971                                                                                                                 | emr-1                                                                   | 2,32             | 1,22         | 2,66E-02 | Emerin homolog 1                                                                                                                              |
| Q22799                                                                                                                 | dlc-1                                                                   | 2,30             | 1,20         | 8,53E-07 | Dynein light chain 1, cytoplasmic                                                                                                             |
| Q23463                                                                                                                 | eftu-2                                                                  | 2,30             | 1,20         | 1,96E-03 | Elongation Factor TU family                                                                                                                   |
| Q09665                                                                                                                 | trnc-2                                                                  | 2,28             | 1,19         | 2,05E-03 | Troponin C, isoform 2                                                                                                                         |
| Q8WQA4                                                                                                                 | exc-4                                                                   | 2,26             | 1,18         | 2,58E-02 | Chloride intracellular channel exc-4                                                                                                          |
| O17389                                                                                                                 | tth-1                                                                   | 2,25             | 1,17         | 1,35E-08 | Thymosin beta                                                                                                                                 |
| A0A1T5HUZ1;G5EEI5;H9G348;H9G349;H9G350;H9G351;H9G352;H9G353;H9G354;Q06561;Q06561-2;Q06561-4;Q06561-5                   | unc-52                                                                  | 2,21             | 1,14         | 1,91E-02 | Uncharacterized proteins;Basement membrane proteoglycan;Isoform a, c, f of Basement membrane proteoglycan;                                    |
| G5ECY0                                                                                                                 | dlg-1                                                                   | 2,20             | 1,14         | 4,85E-03 | Disks large homolog 1                                                                                                                         |
| Q9XWL1                                                                                                                 | ttr-17                                                                  | 2,20             | 1,14         | 1,53E-03 | TransThyretin-Related family domain                                                                                                           |
| O45599                                                                                                                 | cbd-1                                                                   | 2,18             | 1,12         | 4,11E-07 | Chitin-binding domain protein cbd-1                                                                                                           |
| Q21832                                                                                                                 | rnp-4                                                                   | 2,18             | 1,12         | 1,50E-04 | RNA-binding protein 8A                                                                                                                        |
| G4SL51                                                                                                                 | pqn-52                                                                  | 2,17             | 1,12         | 1,71E-03 | Prion-like-(Q/N-rich)-domain-bearing protein                                                                                                  |
| P90900                                                                                                                 | ifa-4                                                                   | 2,16             | 1,11         | 3,70E-09 | Intermediate filament protein ifa-4                                                                                                           |
| G5ECG8;G5EEC4;G5EFK7;G5EFW2                                                                                            | vab-10                                                                  | 2,15             | 1,11         | 3,93E-12 | Uncharacterized protein;VAB-10A protein;Uncharacterized protein;Uncharacterized protein                                                       |
| P21137;P21137-10;P21137-11;P21137-12;P21137-13;P21137-2;P21137-3;P21137-4;P21137-5;P21137-6;P21137-7;P21137-8;P21137-9 | kin-1                                                                   | 2,15             | 1,11         | 3,36E-02 | cAMP-dependent protein kinase catalytic subunit;Isoform j, k, l, m, a, b, c, d, f, g, h, i of cAMP-dependent protein kinase catalytic subunit |
| G5EBP5                                                                                                                 | CELE_ZC247.1                                                            | 2,15             | 1,11         | 1,02E-06 | Uncharacterized protein                                                                                                                       |
| Q20660;Q7JP52                                                                                                          | hsp-17                                                                  | 2,15             | 1,10         | 5,25E-07 | Heat Shock Protein                                                                                                                            |
| G5EBJ8;P05634;P53017;P53018;P53019;Q17856;Q18461;Q21244;Q23519                                                         | CELE_Y59E9AR.1;msp-10;msp-19;msp-32;msp-33;msp-55;msp-49;msp-63;msp-152 | 2,14             | 1,10         | 1,96E-07 | Major sperm protein;Major sperm protein 10/36/56/76;Major sperm protein19/31/40/45/50/51/53/59/61/65/81/113/142/32/33/55/57/49/63/152         |
| A0A061ACM2;A0A061ACP8;A0A061ADW6;G5ED33;G5EFE0;O18250;Q7YTG1                                                           | eps-8                                                                   | 2,14             | 1,10         | 3,94E-03 | EPS (Human endocytosis) related                                                                                                               |
| H2KYV3;Q18076                                                                                                          | C18B2.5                                                                 | 2,13             | 1,09         | 3,31E-04 | Uncharacterized protein                                                                                                                       |
| Q10051                                                                                                                 | prp-19                                                                  | 2,12             | 1,09         | 1,10E-05 | Pre-mRNA-processing factor 19                                                                                                                 |
| O17921                                                                                                                 | tbb-1                                                                   | 2,11             | 1,08         | 1,82E-02 | Tubulin beta chain                                                                                                                            |
| P55853                                                                                                                 | smo-1                                                                   | 2,10             | 1,07         | 6,65E-06 | Small ubiquitin-related modifier                                                                                                              |
| D75F13                                                                                                                 | C02D5.4                                                                 | 2,09             | 1,07         | 1,20E-07 | Uncharacterized protein                                                                                                                       |
| Q23614                                                                                                                 | CELE_ZK822.2                                                            | 2,09             | 1,07         | 4,04E-02 | Uncharacterized protein                                                                                                                       |
| Q69Z12                                                                                                                 | mlc-7                                                                   | 2,09             | 1,06         | 3,73E-03 | Myosin Light Chain                                                                                                                            |
| Q93805                                                                                                                 | ttr-31                                                                  | 2,08             | 1,05         | 4,22E-02 | TransThyretin-Related family domain                                                                                                           |
| Q9XUW5                                                                                                                 | ddx-17                                                                  | 2,07             | 1,05         | 2,73E-04 | DEAD box helicase homolog                                                                                                                     |
| Q965V4                                                                                                                 | xpo-2                                                                   | 2,05             | 1,04         | 3,69E-04 | EXPOrtin (Nuclear export receptor)                                                                                                            |
| O01530                                                                                                                 | asp-6                                                                   | 2,04             | 1,03         | 2,38E-06 | Aspartic protease 6                                                                                                                           |
| Q18823                                                                                                                 | lam-2                                                                   | 2,03             | 1,02         | 2,37E-06 | Laminin-like protein lam-2                                                                                                                    |
| D1MN68                                                                                                                 | gpb-1                                                                   | 2,00             | 1,00         | 4,35E-02 | G Protein, Beta subunit                                                                                                                       |
| G5ECR7                                                                                                                 | elb-1                                                                   | 2,00             | 1,00         | 2,04E-02 | ELongin B                                                                                                                                     |
| Q9U2F2                                                                                                                 | cpt-1                                                                   | 2,00             | 1,00         | 1,44E-03 | Carnitine Palmitoyl Transferase                                                                                                               |
| Q18599                                                                                                                 | acer-1                                                                  | 1,99             | 0,99         | 1,20E-10 | ACETyl-CoA Regulator                                                                                                                          |
| Q20762                                                                                                                 | F54D1.6                                                                 | 1,99             | 0,99         | 3,44E-02 | Uncharacterized protein F54D1.6                                                                                                               |
| O76565                                                                                                                 | F13C5.5                                                                 | 1,97             | 0,98         | 8,84E-03 | Uncharacterized protein F13C5.5                                                                                                               |
| Q9XVR7                                                                                                                 | mcm-3                                                                   | 1,97             | 0,98         | 6,89E-04 | DNA helicase                                                                                                                                  |
| Q5WRM0;Q9XUT9                                                                                                          | CELE_K06G5.1                                                            | 1,95             | 0,96         | 1,08E-03 | Uncharacterized protein                                                                                                                       |
| P49029                                                                                                                 | mag-1                                                                   | 1,94             | 0,96         | 7,07E-06 | Protein mago nashi homolog                                                                                                                    |
| A0A0K3AXF6;Q9U2U0                                                                                                      | uaf-2                                                                   | 1,94             | 0,95         | 2,74E-02 | U2AF splicing factor                                                                                                                          |
| Q18758                                                                                                                 | klo-1                                                                   | 1,92             | 0,94         | 1,42E-03 | KLOtho (Mammalian aging-associated protein) homolog                                                                                           |
| Q21929                                                                                                                 | dhs-21                                                                  | 1,92             | 0,94         | 2,01E-07 | L-xylulose reductase                                                                                                                          |
| O44565                                                                                                                 | lam-1                                                                   | 1,92             | 0,94         | 3,09E-05 | LAMINin related. See also lmb                                                                                                                 |
| O44887                                                                                                                 | inx-13                                                                  | 1,91             | 0,94         | 1,45E-03 | Innexin                                                                                                                                       |
| P19826;Q8MPS2                                                                                                          | deb-1                                                                   | 1,91             | 0,93         | 4,75E-04 | Vinculin;Dense Body                                                                                                                           |
| G5EDQ4;G5EDV5;G5EF89;G5EGA4                                                                                            | cle-1                                                                   | 1,91             | 0,93         | 1,15E-02 | CLE-1C protein;CLE-1B protein;ColLagen with Endostatin domain;ColLagen with Endostatin domain                                                 |
| G5ECQ4                                                                                                                 | sth-1                                                                   | 1,90             | 0,92         | 3,55E-02 | Novel protein                                                                                                                                 |
| Q9NEW6                                                                                                                 | rsp-3                                                                   | 1,89             | 0,92         | 4,00E-03 | Probable splicing factor, arginine/serine-rich 3                                                                                              |
| Q03565                                                                                                                 | baf-1                                                                   | 1,89             | 0,92         | 1,43E-04 | Barrier-to-autointegration factor 1                                                                                                           |
| Q20264                                                                                                                 | acs-11                                                                  | 1,88             | 0,91         | 3,44E-06 | Fatty Acid CoA Synthetase family                                                                                                              |

| UniProt ID                                                | Gene                             | Lb23/OP 50 ratio | log2 (ratio) | Qvalue   | Protein description                                                                                               |
|-----------------------------------------------------------|----------------------------------|------------------|--------------|----------|-------------------------------------------------------------------------------------------------------------------|
| Q18529                                                    | C39D10.7                         | 1,88             | 0,91         | 3,44E-12 | Uncharacterized protein                                                                                           |
| Q45812                                                    | CELE_T23G11.7                    | 1,88             | 0,91         | 4,35E-02 | Uncharacterized protein                                                                                           |
| P90901;P90901-2;<br>P90901-3;P90901-4                     | ifa-1                            | 1,87             | 0,90         | 3,12E-15 | Intermediate filament protein ifa-1;Isoform b, c, d of Intermediate filament protein ifa-1                        |
| Q27512;Q7JMT5                                             | nex-2                            | 1,86             | 0,90         | 7,85E-04 | Annexin                                                                                                           |
| A0A061AD21;A0A061AJI9;C1P640;<br>C1P641;G5EEV6;<br>Q21313 | epi-1                            | 1,85             | 0,89         | 2,05E-09 | Uncharacterized protein;Uncharacterized protein;Uncharacterized protein;Laminin alpha; Laminin-like protein epi-1 |
| O16887                                                    | C29G2.6                          | 1,85             | 0,89         | 3,11E-02 | Uncharacterized protein C29G2.6                                                                                   |
| H2L0I2;H2L0I3                                             | lfi-1                            | 1,85             | 0,88         | 6,62E-39 | Lin-5 (Five) Interacting protein                                                                                  |
| Q9U3C8;Q9U3C8-2                                           | dcn-1                            | 1,85             | 0,88         | 2,30E-02 | Defective in cullin neddylation protein 1;Isoform b of Defective in cullin neddylation protein 1                  |
| Q23089                                                    | xpo-1                            | 1,84             | 0,88         | 9,41E-03 | EXPOrtin (Nuclear export receptor)                                                                                |
| Q9NLD1                                                    | hrp-2                            | 1,84             | 0,88         | 7,49E-09 | HnRNP A1 homolog                                                                                                  |
| Q10020                                                    | T28D9.1                          | 1,84             | 0,88         | 1,21E-02 | Uncharacterized protein T28D9.1                                                                                   |
| P34685                                                    | cap-1                            | 1,84             | 0,88         | 1,49E-03 | F-actin-capping protein subunit alpha                                                                             |
| G5EGU1                                                    | egl-30                           | 1,83             | 0,88         | 4,29E-03 | EGL-30                                                                                                            |
| P52652                                                    | T24H10.1                         | 1,83             | 0,87         | 1,69E-03 | Putative transcription elongation factor S-II                                                                     |
| Q22492                                                    | hex-1                            | 1,83             | 0,87         | 4,68E-08 | Beta-hexosaminidase A                                                                                             |
| O46015;Q7JKM0;<br>Q7YTU0                                  | tep-1                            | 1,83             | 0,87         | 4,23E-06 | TEP (ThiolEster containing Protein)                                                                               |
| Q19853                                                    | CELE_F28B4.3                     | 1,82             | 0,86         | 5,97E-14 | Uncharacterized protein                                                                                           |
| G5EBK3                                                    | erm-1                            | 1,82             | 0,86         | 3,09E-05 | ERM-1B                                                                                                            |
| Q9BPN5                                                    | zlg-11                           | 1,81             | 0,86         | 6,38E-03 | 2 (Zwei) IG domain protein                                                                                        |
| Q18817                                                    | ben-1                            | 1,81             | 0,86         | 3,52E-04 | Tubulin beta chain                                                                                                |
| Q9XXI9                                                    | mcm-2                            | 1,80             | 0,85         | 5,21E-03 | DNA helicase                                                                                                      |
| P30625;P30625-3                                           | kin-2                            | 1,80             | 0,85         | 2,05E-03 | cAMP-dependent protein kinase regulatory subunit;Isoform c of cAMP-dependent protein kinase regulatory subunit    |
| Q27371                                                    | mup-2                            | 1,80             | 0,85         | 9,01E-07 | Troponin T                                                                                                        |
| Q9N3G0                                                    | CELE_Y53G8AR.6                   | 1,80             | 0,84         | 3,92E-03 | Uncharacterized protein                                                                                           |
| P34556                                                    | cdk-1                            | 1,79             | 0,84         | 8,27E-03 | Cyclin-dependent kinase 1                                                                                         |
| Q22129                                                    | CELE_T03G6.3                     | 1,79             | 0,84         | 1,82E-02 | Uncharacterized protein                                                                                           |
| P17343                                                    | gpb-1                            | 1,78             | 0,83         | 1,49E-03 | Guanine nucleotide-binding protein subunit beta-1                                                                 |
| Q23683                                                    | CELE_ZK970.7                     | 1,78             | 0,83         | 3,50E-04 | Uncharacterized protein                                                                                           |
| O17915                                                    | ran-1                            | 1,78             | 0,83         | 9,32E-05 | GTP-binding nuclear protein ran-1                                                                                 |
| G5EEL1;G5EFG1;<br>G5EFL5                                  | alp-1                            | 1,77             | 0,82         | 4,73E-04 | ALP/Enigma encoding                                                                                               |
| Q18100;Q4PIU9;<br>Q53U86;Q53U87                           | sax-7                            | 1,76             | 0,82         | 1,29E-05 | Sensory AXon guidance;Sensory AXon guidance;SAX-7 SHORTFORM;SAX-7 LONGFORM                                        |
| G5EGK1                                                    | tin-1                            | 1,76             | 0,82         | 6,89E-03 | Talin                                                                                                             |
| O45569                                                    | nep-17                           | 1,76             | 0,82         | 7,87E-15 | NEPrllysin metallopeptidase family                                                                                |
| Q21898                                                    | vha-1                            | 1,75             | 0,81         | 3,60E-03 | V-type proton ATPase 16 kDa proteolipid subunit 1                                                                 |
| Q18066;Q18066-2                                           | dim-1                            | 1,75             | 0,80         | 1,17E-15 | Disorganized muscle protein 1;Isoform b of Disorganized muscle protein 1                                          |
| I2HAG1;Q09581;Q95Z14                                      | lec-3                            | 1,74             | 0,80         | 9,76E-05 | Galectin;32 kDa beta-galactoside-binding lectin lec-3;Galectin                                                    |
| Q18211                                                    | ran-3                            | 1,73             | 0,79         | 7,25E-03 | Regulator of chromosome condensation                                                                              |
| Q10033;Q10033-2;Q8I4L0                                    | F15G9.1;F15G9.1;<br>CELE_F15G9.1 | 1,72             | 0,78         | 6,33E-04 | Uncharacterized protein F15G9.1;Isoform b of Uncharacterized protein F15G9.1;Uncharacterized protein              |
| Q21763                                                    | CELE_R05H5.3                     | 1,72             | 0,78         | 2,53E-07 | Uncharacterized protein                                                                                           |
| K8ES75                                                    | ctg-1                            | 1,72             | 0,78         | 3,44E-02 | CRAL/TRIO and GOLD domain containing                                                                              |
| P12845                                                    | myo-2                            | 1,72             | 0,78         | 3,04E-10 | Myosin-2                                                                                                          |
| G5ECT6                                                    | gpc-2                            | 1,72             | 0,78         | 1,73E-02 | G Protein, Gamma subunit                                                                                          |
| P36573                                                    | lec-1                            | 1,72             | 0,78         | 5,32E-18 | 32 kDa beta-galactoside-binding lectin                                                                            |
| Q9GPA1                                                    | CELE_F48E3.4                     | 1,71             | 0,78         | 2,23E-08 | Uncharacterized protein                                                                                           |
| O45815                                                    | act-5                            | 1,71             | 0,78         | 1,63E-11 | ACTin                                                                                                             |
| Q23050                                                    | clik-1                           | 1,71             | 0,77         | 1,02E-11 | CaLponin-like proteins                                                                                            |
| H9G2S0;Q19191                                             | CELE_F08B12.4;<br>F08B12.4       | 1,71             | 0,77         | 4,64E-04 | Uncharacterized protein;Uncharacterized protein F08B12.4                                                          |
| G5EDM4;G5EE55;G5EFP7;X5LQ26;<br>X5LVA5                    | nrfl-1                           | 1,70             | 0,77         | 8,76E-06 | NHERF (Mammalian Na/H Exchange Regulatory Factor) Like                                                            |
| P49595;Q8MNS3                                             | F42G9.1;<br>CELE_F42G9.1         | 1,70             | 0,77         | 4,23E-02 | Probable protein phosphatase 2C F42G9.1;Uncharacterized protein                                                   |
| Q20655                                                    | fft-2                            | 1,70             | 0,76         | 1,31E-06 | 14-3-3-like protein 2                                                                                             |
| Q21702                                                    | CELE_R04B5.5                     | 1,70             | 0,76         | 3,42E-02 | Uncharacterized protein                                                                                           |
| G5EE12                                                    | cash-1                           | 1,70             | 0,76         | 3,94E-02 | CKA And Striatin Homolog                                                                                          |
| A9UJN7                                                    | maph-1.2                         | 1,69             | 0,76         | 2,81E-03 | Microtubule-Associated Protein Homolog                                                                            |
| H2KZV8;Q9GP94                                             | mlp-1                            | 1,69             | 0,76         | 4,75E-02 | MLP/CRP family (Muscle LIM Protein/Cysteine-rich Protein)                                                         |
| Q11176                                                    | unc-78                           | 1,69             | 0,76         | 1,59E-04 | Actin-interacting protein 1                                                                                       |
| G5EGB1                                                    | lec-2                            | 1,68             | 0,75         | 5,92E-11 | Galectin                                                                                                          |
| H2L0K4;Q8WTM0                                             | CELE_Y45G5AL.1                   | 1,68             | 0,75         | 6,57E-03 | Uncharacterized protein                                                                                           |
| G5EGB3                                                    | ragc-1                           | 1,68             | 0,74         | 2,69E-02 | RAs-related GTP binding protein C homolog                                                                         |
| G5EFP2                                                    | CELE_ZK1321.4                    | 1,67             | 0,74         | 2,80E-05 | Uncharacterized protein                                                                                           |
| Q9XTT3                                                    | scav-3                           | 1,66             | 0,73         | 1,28E-06 | SCAVenger receptor (CD36 family) related                                                                          |
| P91390                                                    | ostd-1                           | 1,66             | 0,73         | 3,48E-02 | Dolichyl-diphosphooligosaccharide--protein glycosyltransferase subunit 2                                          |
| O76840;O76840-2                                           | mig-6                            | 1,65             | 0,72         | 9,62E-26 | Papilin;Isoform a of Papilin                                                                                      |
| Q17473                                                    | ttr-18                           | 1,64             | 0,72         | 1,96E-02 | TransThyretin-Related family domain                                                                               |
| O16214                                                    | CELE_F17A9.4                     | 1,64             | 0,72         | 1,32E-03 | Uncharacterized protein                                                                                           |
| Q22037;Q22037-4                                           | hrp-1                            | 1,64             | 0,71         | 2,43E-05 | Heterogeneous nuclear ribonucleoprotein A1;Isoform d of Heterogeneous nuclear ribonucleoprotein A1                |
| Q17348                                                    | snr-1                            | 1,64             | 0,71         | 1,41E-02 | Small nuclear ribonucleoprotein Sm D3                                                                             |
| Q9TYW1                                                    | vha-19                           | 1,63             | 0,71         | 2,63E-03 | Vacuolar H ATPase                                                                                                 |
| Q9GYF1                                                    | unc-27                           | 1,63             | 0,71         | 1,65E-11 | Troponin I 2                                                                                                      |



| UniProt ID                                  | Gene          | Lb23/OP 50 ratio | log2 (ratio) | Qvalue   | Protein description                                                                                          |
|---------------------------------------------|---------------|------------------|--------------|----------|--------------------------------------------------------------------------------------------------------------|
| Q9NA39                                      | ccg-1         | 1,63             | 0,71         | 2,55E-03 | Conserved Cysteine/Glycine domain protein                                                                    |
| Q20616                                      | skpo-1        | 1,63             | 0,70         | 1,77E-03 | Peroxidase skpo-1                                                                                            |
| Q22866-3                                    | lev-11        | 1,62             | 0,70         | 5,02E-04 | Isoform b of Tropomyosin isoforms a/b/d/f                                                                    |
| E0AHA7;G5EG85;Q9U9J8;S6FN00                 | unc-70        | 1,62             | 0,70         | 3,36E-08 | Spectrin beta chain                                                                                          |
| P34650                                      | ZK632.4       | 1,62             | 0,70         | 6,23E-03 | Probable mannose-6-phosphate isomerase                                                                       |
| P91859;P91859-3                             | maph-1.1      | 1,62             | 0,69         | 3,90E-05 | Microtubule-associated protein homolog maph-1.1;Isoform c of Microtubule-associated protein homolog maph-1.1 |
| G5EDB8                                      | vha-4         | 1,62             | 0,69         | 1,43E-02 | VHA-4                                                                                                        |
| Q22752                                      | dyrb-1        | 1,61             | 0,69         | 4,83E-02 | Dynein light chain roadblock                                                                                 |
| Q21633                                      | ubc-18        | 1,61             | 0,69         | 2,10E-04 | UBiquitin Conjugating enzyme                                                                                 |
| G5EET8                                      | pud-1.2       | 1,60             | 0,68         | 2,39E-06 | Protein Up-regulated in Daf-2(Gf)                                                                            |
| P91910                                      | mec-12        | 1,60             | 0,68         | 1,47E-02 | Tubulin alpha-3 chain                                                                                        |
| O02495                                      | snb-1         | 1,60             | 0,68         | 2,65E-04 | Synaptobrevin-1                                                                                              |
| Q18577                                      | C42D4.1       | 1,59             | 0,67         | 4,35E-03 | Uncharacterized protein                                                                                      |
| Q72072                                      | tnt-2         | 1,59             | 0,67         | 1,68E-05 | TropoNin T                                                                                                   |
| P34686                                      | cap-2         | 1,59             | 0,67         | 4,36E-03 | F-actin-capping protein subunit beta                                                                         |
| Q5H9M9                                      | hsp-25        | 1,58             | 0,66         | 2,58E-05 | Heat Shock Protein                                                                                           |
| O44827-2                                    | fgt-1         | 1,58             | 0,66         | 2,04E-03 | Isoform a of Facilitated glucose transporter protein 1                                                       |
| Q8MXS9;Q9N3S3;Q9N3S4                        | rnp-6         | 1,58             | 0,66         | 6,38E-03 | RNP (RRM RNA binding domain) containing                                                                      |
| A0A1N7SYN7;A0A1N7SYN9;A0A1N7SYP3;A0A1N7SYR7 | vab-10        | 1,57             | 0,65         | 9,32E-13 | Uncharacterized protein                                                                                      |
| Q23487;Q7Z145                               | fu1-2         | 1,57             | 0,65         | 3,41E-02 | FUBp (FUBP) Like                                                                                             |
| H2KYJ2                                      | ttr-59        | 1,57             | 0,65         | 2,90E-04 | TransThyretin-Related family domain                                                                          |
| Q20626;Q565D1;Q565D2                        | CELE_F49E2.5  | 1,57             | 0,65         | 1,36E-02 | Uncharacterized protein                                                                                      |
| Q21888                                      | CELE_R102.2   | 1,57             | 0,65         | 3,44E-04 | Uncharacterized protein                                                                                      |
| P34696                                      | hsp-16.1      | 1,57             | 0,65         | 2,86E-02 | Heat shock protein Hsp-16.1/Hsp-16.11                                                                        |
| Q17886                                      | nasp-1        | 1,56             | 0,64         | 7,40E-03 | NASP (Human Nuclear Autoantigenic Sperm Protein) homolog                                                     |
| G5EFE3                                      | CELE_H03A11.2 | 1,56             | 0,64         | 3,36E-05 | Uncharacterized protein                                                                                      |
| Q20222;Q27GU2                               | lbp-3         | 1,56             | 0,64         | 3,36E-04 | Fatty acid-binding protein homolog 3;Lipid Binding Protein                                                   |
| G8XY6;Q23232                                | wdr-4         | 1,56             | 0,64         | 8,22E-05 | tRNA (guanine-N(7)-)methyltransferase non-catalytic subunit                                                  |
| Q09422                                      | pgam-5        | 1,56             | 0,64         | 4,74E-02 | Serine/threonine-protein phosphatase Pgam5, mitochondrial                                                    |
| P34477                                      | ubc-7         | 1,56             | 0,64         | 4,30E-02 | Probable ubiquitin-conjugating enzyme E2 7                                                                   |
| Q19289                                      | ifb-1         | 1,56             | 0,64         | 1,13E-13 | Intermediate filament protein ifb-1                                                                          |
| A0A0K3AUC2                                  | lev-11        | 1,56             | 0,64         | 9,74E-13 | Uncharacterized protein                                                                                      |
| P91502                                      | usp-5         | 1,56             | 0,64         | 2,10E-02 | Ubiquitin carboxyl-terminal hydrolase                                                                        |
| Q5WRT8;Q5WRT9                               | npp-21        | 1,55             | 0,64         | 1,31E-02 | Nuclear Pore complex Protein                                                                                 |
| G5ECR0                                      | CELE_T25C12.3 | 1,55             | 0,63         | 2,13E-04 | Uncharacterized protein                                                                                      |
| A0A2C9C2Z1;A0A2C9C3A7;Q9N4M4                | anc-1         | 1,54             | 0,63         | 3,08E-50 | Uncharacterized protein;Uncharacterized protein;Nuclear anchorage protein 1                                  |
| H2KZA3;V6CKH6;V6CLQ8;V6CLV0                 | pqn-22        | 1,54             | 0,62         | 6,12E-03 | Prion-like-(Q/N-rich)-domain-bearing protein                                                                 |
| Q22918                                      | C37C3.2       | 1,54             | 0,62         | 7,44E-03 | Eukaryotic translation initiation factor 5                                                                   |
| Q1HB04;Q22317                               | anp-1         | 1,54             | 0,62         | 4,21E-02 | Aminopeptidase                                                                                               |
| P90961                                      | cltc-1        | 1,53             | 0,62         | 7,10E-05 | Clathrin light chain                                                                                         |
| A0A0K3AVF2;O61874                           | dod-19        | 1,53             | 0,62         | 8,04E-03 | Downstream Of DAF-16 (Regulated by DAF-16)                                                                   |
| Q20363                                      | slp-1         | 1,53             | 0,61         | 1,04E-07 | Stress-induced protein 1                                                                                     |
| Q18680-4                                    | pyp-1         | 1,53             | 0,61         | 5,08E-11 | Isoform d of Inorganic pyrophosphatase 1                                                                     |
| Q19826                                      | rpb-8         | 1,53             | 0,61         | 2,58E-02 | Probable DNA-directed RNA polymerases I, II, and III subunit RPABC3                                          |
| G5EGP4                                      | vha-6         | 1,53             | 0,61         | 1,43E-02 | V-type proton ATPase subunit a                                                                               |
| O01806                                      | ssb-1         | 1,52             | 0,61         | 2,45E-03 | Sjogren Syndrome antigen B homolog                                                                           |
| P53014                                      | mlc-3         | 1,52             | 0,60         | 2,28E-07 | Myosin, essential light chain                                                                                |
| Q20774                                      | dni-13        | 1,52             | 0,60         | 7,70E-04 | DNAJ domain (Prokaryotic heat shock protein)                                                                 |
| O61880                                      | CELE_F59B1.2  | 1,51             | 0,60         | 5,76E-05 | Uncharacterized protein                                                                                      |
| G8JXY9;Q11073                               | B0416.5       | 1,51             | 0,59         | 1,43E-02 | Uncharacterized protein;Uncharacterized protein B0416.5                                                      |
| O45819                                      | gyg-2         | 1,51             | 0,59         | 1,38E-02 | GLYcoGenin like                                                                                              |
| P34690                                      | tba-2         | 1,50             | 0,59         | 6,15E-03 | Tubulin alpha-2 chain                                                                                        |
| Q9N5G9                                      | CELE_K12H6.6  | 1,50             | 0,58         | 1,02E-03 | Uncharacterized protein                                                                                      |
| Q23451                                      | rad-23        | 1,50             | 0,58         | 3,92E-06 | Uncharacterized protein                                                                                      |
| Q9BL19                                      | rpl-17        | 0,67             | -0,58        | 4,22E-06 | 60S ribosomal protein L17                                                                                    |
| P91128                                      | rpl-13        | 0,67             | -0,58        | 1,67E-07 | 60S ribosomal protein L13                                                                                    |
| Q86NC1;Q9N5U1                               | pygl-1        | 0,67             | -0,59        | 2,63E-09 | Alpha-1,4 glucan phosphorylase;Alpha-1,4 glucan phosphorylase                                                |
| Q21966                                      | asp-4         | 0,67             | -0,59        | 7,64E-13 | ASpartyl Protease                                                                                            |
| O61977                                      | ttr-47        | 0,67             | -0,59        | 6,15E-03 | TransThyretin-Related family domain                                                                          |
| Q20034                                      | CELE_F35D11.4 | 0,66             | -0,59        | 3,75E-02 | Uncharacterized protein                                                                                      |
| G5EEI4                                      | asp-1         | 0,66             | -0,59        | 2,33E-05 | ASpartyl Protease                                                                                            |
| O45864                                      | CELE_T27E9.2  | 0,66             | -0,59        | 6,43E-03 | Cytochrome b-c1 complex subunit 6                                                                            |
| Q93934                                      | CELE_R07H5.8  | 0,66             | -0,60        | 6,15E-06 | Uncharacterized protein                                                                                      |
| Q19057                                      | acdh-12       | 0,66             | -0,60        | 1,57E-03 | Acyl CoA DeHydrogenase                                                                                       |
| O45946                                      | rpl-18        | 0,66             | -0,60        | 1,98E-09 | 60S ribosomal protein L18                                                                                    |
| O44906                                      | pck-1         | 0,66             | -0,61        | 4,22E-11 | Phosphoenolpyruvate CarboxyKinase                                                                            |
| Q21217                                      | gta-1         | 0,66             | -0,61        | 5,48E-11 | Probable 4-aminobutyrate aminotransferase, mitochondrial                                                     |
| Q7YTR9                                      | C27B7.9       | 0,65             | -0,61        | 2,55E-03 | Uncharacterized protein                                                                                      |
| O61235                                      | chl-1         | 0,65             | -0,61        | 8,86E-06 | Catalase-2                                                                                                   |
| O44995                                      | CELE_K12C11.1 | 0,65             | -0,63        | 1,79E-05 | Uncharacterized protein                                                                                      |
| P50432;P50432-2                             | mel-32        | 0,65             | -0,63        | 1,30E-06 | Serine hydroxymethyltransferase;Isoform a of Serine hydroxymethyltransferase                                 |
| Q69Z13;Q86D12;Q9XUS4;Q9XUS5;Q9XUS6          | CELE_K08E3.5  | 0,65             | -0,63        | 2,25E-06 | UTP--glucose-1-phosphate uridylyltransferase                                                                 |
| O02639                                      | rpl-19        | 0,64             | -0,64        | 1,82E-09 | 60S ribosomal protein L19                                                                                    |
| Q21962;Q86LS6                               | gldc-1        | 0,64             | -0,64        | 3,02E-06 | Glycine cleavage system P protein                                                                            |
| Q09365                                      | ZK1320.3      | 0,64             | -0,64        | 3,64E-02 | Uncharacterized protein ZK1320.3                                                                             |

| UniProt ID           | Gene                           | Lb23/OP 50 ratio | log2 (ratio) | Qvalue   | Protein description                                                                               |
|----------------------|--------------------------------|------------------|--------------|----------|---------------------------------------------------------------------------------------------------|
| O17271               | heh-1                          | 0,64             | -0,64        | 2,90E-02 | Putative protein heh-1                                                                            |
| G5EE46               | CELE_F54D5.12                  | 0,64             | -0,65        | 1,33E-02 | Uncharacterized protein                                                                           |
| Q19437               | upb-1                          | 0,64             | -0,65        | 2,37E-10 | UreidoPropionase Beta                                                                             |
| Q966C6;Q966C6-2      | rpl-7A                         | 0,63             | -0,66        | 4,83E-06 | 60S ribosomal protein L7a;Isoform c of 60S ribosomal protein L7a                                  |
| Q9NAB0               | gst-39                         | 0,63             | -0,66        | 2,60E-02 | Glutathione S-Transferase                                                                         |
| O01578               | mpc-2                          | 0,63             | -0,66        | 1,21E-02 | Probable mitochondrial pyruvate carrier 2                                                         |
| Q23621               | gdh-1                          | 0,63             | -0,66        | 2,00E-24 | Glutamate dehydrogenase                                                                           |
| P52014               | cyn-6                          | 0,63             | -0,67        | 1,61E-02 | Peptidyl-prolyl cis-trans isomerase 6                                                             |
| O01812               | lbp-6                          | 0,63             | -0,67        | 3,95E-10 | Fatty acid-binding protein homolog 6                                                              |
| Q03577               | dars-1                         | 0,63             | -0,67        | 5,84E-03 | Aspartate-tRNA ligase, cytoplasmic                                                                |
| Q9Y041               | hgo-1                          | 0,63             | -0,68        | 5,17E-05 | Homogentisate 1,2-dioxygenase                                                                     |
| P98080               | ucr-1                          | 0,62             | -0,68        | 9,39E-14 | Cytochrome b-c1 complex subunit 1, mitochondrial                                                  |
| Q94272               | fah-1                          | 0,62             | -0,69        | 4,05E-05 | FumarylAcetoacetate Hydrolase                                                                     |
| O44512               | isp-1                          | 0,62             | -0,69        | 7,58E-05 | Cytochrome b-c1 complex subunit Rieske, mitochondrial                                             |
| Q8MX11               | ucr-11                         | 0,62             | -0,69        | 3,42E-03 | Ubiquinol-Cytochrome c oxidoReductase complex                                                     |
| P34662               | rpl-35                         | 0,62             | -0,70        | 1,83E-05 | 60S ribosomal protein L35                                                                         |
| O62388               | CELE_W01D2.1                   | 0,61             | -0,70        | 1,70E-02 | Ribosomal protein L37                                                                             |
| Q21355               | gst-4                          | 0,61             | -0,70        | 1,89E-06 | Glutathione S-transferase 4                                                                       |
| Q9XW17               | car-1                          | 0,61             | -0,70        | 6,27E-10 | Cytokinesis, Apoptosis, RNA-associated                                                            |
| Q23381               | mmcm-1                         | 0,61             | -0,71        | 4,58E-03 | Probable methylmalonyl-CoA mutase, mitochondrial                                                  |
| H2L0B6;Q21956        | CELE_R12C12.9                  | 0,61             | -0,71        | 3,15E-02 | Uncharacterized protein                                                                           |
| O62146               | F09B12.3                       | 0,61             | -0,72        | 1,42E-03 | Putative phospholipase B-like 2                                                                   |
| Q09450               | C05C10.3                       | 0,60             | -0,73        | 2,46E-06 | Probable succinyl-CoA:3-ketoacid coenzyme A transferase, mitochondrial                            |
| G5EEH6               | ivd-1                          | 0,60             | -0,74        | 1,59E-05 | Isovaleryl-CoA dehydrogenase                                                                      |
| D4YWC3               | dct-16                         | 0,60             | -0,75        | 1,85E-12 | DAF-16/FOXO Controlled, germline Tumor affecting                                                  |
| B7WNA0               | pyk-1                          | 0,58             | -0,78        | 6,26E-14 | Pyruvate kinase                                                                                   |
| O61790               | R12E2.11                       | 0,58             | -0,78        | 8,45E-03 | Orotate phosphoribosyltransferase                                                                 |
| O62277               | dct-18                         | 0,58             | -0,78        | 6,18E-04 | DAF-16/FOXO Controlled, germline Tumor affecting                                                  |
| O02089               | msra-1                         | 0,58             | -0,79        | 2,61E-05 | Methionine Sulfoxide Reductase A                                                                  |
| O16521               | hpo-19                         | 0,58             | -0,79        | 5,02E-06 | NADH-cytochrome b5 reductase                                                                      |
| H2KZD5;Q27GU1        | csr-1                          | 0,57             | -0,80        | 1,26E-03 | Chromosome-Segregation and RNAi deficient                                                         |
| G5EGP8               | cpz-1                          | 0,57             | -0,80        | 7,83E-04 | CathePsin Z                                                                                       |
| Q9UAW8;W6RTL8        | CELE_T12B3.3;<br>CELE_Y40C5A.4 | 0,57             | -0,81        | 6,65E-03 | Uncharacterized protein                                                                           |
| O62122               | gcsH-1                         | 0,56             | -0,82        | 2,41E-02 | Glycine cleavage system H protein                                                                 |
| Q22993               | pmt-2                          | 0,56             | -0,82        | 7,81E-06 | Phosphoethanolamine MethylTransferase                                                             |
| Q18853               | cyc-1                          | 0,56             | -0,83        | 7,00E-05 | Cytochrome C                                                                                      |
| O17345               | ttr-6                          | 0,56             | -0,83        | 1,24E-04 | TransThyretin-Related family domain                                                               |
| Q19478               | far-3                          | 0,56             | -0,84        | 1,40E-07 | Fatty Acid/Retinol binding protein                                                                |
| Q21770               | wago-1                         | 0,55             | -0,85        | 2,80E-04 | Argonaute protein wago-1                                                                          |
| Q93619               | bckd-1b                        | 0,55             | -0,85        | 1,01E-02 | Branched Chain Keto acid Dehydrogenase e1 (E1) subunit                                            |
| Q20502               | haly-1                         | 0,55             | -0,86        | 1,63E-02 | Histidine ammonia-lyase                                                                           |
| P34559               | ech-6                          | 0,55             | -0,87        | 8,09E-09 | Probable enoyl-CoA hydratase, mitochondrial                                                       |
| Q22100               | kat-1                          | 0,55             | -0,88        | 7,63E-08 | Acetyl-CoA acetyltransferase homolog, mitochondrial                                               |
| G5ED31;G5EDD1        | ucr-2.1                        | 0,54             | -0,88        | 1,22E-06 | Ubiquinol-Cytochrome c oxidoReductase complex                                                     |
| O17680               | sams-1                         | 0,54             | -0,88        | 1,27E-17 | Probable S-adenosylmethionine synthase 1                                                          |
| G5EET3               | cdr-6                          | 0,54             | -0,88        | 1,67E-03 | CaDmium Responsive                                                                                |
| O44400               | F37C4.5                        | 0,54             | -0,90        | 1,30E-31 | Protein F37C4.5                                                                                   |
| P34383               | far-2                          | 0,53             | -0,92        | 8,31E-54 | Fatty-acid and retinol-binding protein 2                                                          |
| O18000               | pes-9                          | 0,52             | -0,93        | 1,97E-10 | Patterned Expression Site                                                                         |
| O17795;Q17703        | stdh-2;stdh-1                  | 0,52             | -0,94        | 1,95E-04 | Putative steroid dehydrogenase 2;Putative steroid dehydrogenase 1                                 |
| Q9XVF7               | rpl-2                          | 0,52             | -0,94        | 2,22E-06 | 60S ribosomal protein L8                                                                          |
| P34528               | K12H4.7                        | 0,52             | -0,96        | 1,55E-03 | Putative serine protease K12H4.7                                                                  |
| Q7Z1Q3               | alh-12                         | 0,51             | -0,96        | 4,00E-09 | Aldehyde deHydrogenase                                                                            |
| Q9U2M4               | hphd-1                         | 0,51             | -0,96        | 6,46E-19 | Hydroxyacid-oxoacid transhydrogenase, mitochondrial                                               |
| Q21603               | ugt-62                         | 0,51             | -0,98        | 1,20E-02 | UDP-glucuronosyltransferase                                                                       |
| Q19246               | dhs-25                         | 0,51             | -0,98        | 5,25E-05 | DeHydrogenases, Short chain                                                                       |
| Q22633               | hpd-1                          | 0,51             | -0,98        | 6,83E-06 | 4-hydroxyphenylpyruvate dioxygenase                                                               |
| Q19554               | abcf-1                         | 0,51             | -0,98        | 4,03E-02 | ABC transporter, class F                                                                          |
| Q9XXR4               | ttr-24                         | 0,50             | -1,00        | 3,21E-04 | TransThyretin-Related family domain                                                               |
| E9P851               | mctp-1                         | 0,50             | -1,01        | 2,29E-02 | Multiple C2 and Transmembrane region Protein family homolog                                       |
| Q22111               | mmaa-1                         | 0,50             | -1,01        | 2,60E-02 | Methylmalonic aciduria type A homolog, mitochondrial                                              |
| Q22814               | gst-13                         | 0,50             | -1,01        | 8,22E-03 | Glutathione S-Transferase                                                                         |
| P52713               | alh-8                          | 0,49             | -1,02        | 3,62E-13 | Probable methylmalonate-semialdehyde dehydrogenase [acylating], mitochondrial                     |
| Q09652               | gstk-1                         | 0,49             | -1,03        | 1,82E-02 | Glutathione S-transferase kappa 1                                                                 |
| A5JYX5-2             | dhs-3                          | 0,48             | -1,05        | 1,28E-05 | Isoform a of Protein dhs-3                                                                        |
| Q23068               | CELE_W01A11.1                  | 0,48             | -1,06        | 6,12E-09 | Epoxide hydrolase                                                                                 |
| Q9GUF2               | acp-6                          | 0,48             | -1,07        | 2,95E-12 | ACid Phosphatase family                                                                           |
| G5EDV7               | CELE_Y53H1B.2                  | 0,47             | -1,08        | 8,30E-04 | Uncharacterized protein                                                                           |
| Q19278;Q8MNT7        | hach-1                         | 0,46             | -1,11        | 6,44E-11 | 3-hydroxyisobutyryl-CoA hydrolase, mitochondrial;3-hydroxyisobutyryl-CoA hydrolase, mitochondrial |
| Q9N5E4               | CELE_T02H6.11                  | 0,46             | -1,11        | 8,93E-05 | Uncharacterized protein                                                                           |
| P34689               | glh-1                          | 0,46             | -1,12        | 3,27E-08 | ATP-dependent RNA helicase glh-1                                                                  |
| Q9GZE9               | ldp-1                          | 0,46             | -1,12        | 1,46E-10 | Lipid droplet localized protein                                                                   |
| Q22968               | gcst-1                         | 0,46             | -1,13        | 3,04E-04 | Aminomethyltransferase                                                                            |
| C1P622;Q09517;S6FCZ1 | let-767                        | 0,46             | -1,13        | 2,10E-05 | Uncharacterized protein;Very-long-chain 3-oxoacyl-coA reductase let-767;Uncharacterized protein   |
| P91398               | cey-3                          | 0,46             | -1,13        | 1,39E-05 | C. Elegans Y-box                                                                                  |

| UniProt ID           | Gene            | Lb23/OP 50 ratio | log2 (ratio) | Qvalue    | Protein description                                              |
|----------------------|-----------------|------------------|--------------|-----------|------------------------------------------------------------------|
| Q17761               | T25B9.9         | 0,46             | -1,14        | 1,41E-07  | 6-phosphogluconate dehydrogenase, decarboxylating                |
| Q18938               | gst-42          | 0,45             | -1,14        | 4,99E-04  | Probable maleylacetoacetate isomerase                            |
| Q44503;U4PFH6        | aass-1          | 0,45             | -1,16        | 1,93E-04  | AminoAdipate-Semialdehyde Synthase homolog                       |
| G5EC10               | lec-9           | 0,44             | -1,19        | 4,70E-10  | Galectin                                                         |
| Q86NE0               | asp-2           | 0,44             | -1,19        | 6,19E-06  | ASpartyl Protease                                                |
| O45346               | osm-11          | 0,43             | -1,23        | 9,86E-04  | Uncharacterized protein                                          |
| Q95YF3               | cgh-1           | 0,42             | -1,24        | 3,16E-25  | ATP-dependent RNA helicase cgh-1                                 |
| Q9BL43               | CELE_Y71H2AM.13 | 0,42             | -1,25        | 1,06E-03  | Uncharacterized protein                                          |
| P91306               | cey-2           | 0,42             | -1,25        | 8,81E-13  | C. Elegans Y-box                                                 |
| I2HA98;P90925        | pah-1           | 0,42             | -1,25        | 1,62E-06  | PhenylAlanine Hydroxylase;Probable phenylalanine-4-hydroxylase 1 |
| Q9NAB4               | gst-26          | 0,42             | -1,26        | 2,05E-02  | Glutathione S-Transferase                                        |
| Q22505               | immt-1          | 0,41             | -1,28        | 4,83E-02  | MICOS complex subunit MIC60-1                                    |
| Q20950               | CELE_F57F5.1    | 0,41             | -1,28        | 4,12E-02  | Uncharacterized protein                                          |
| P53585               | acly-1          | 0,40             | -1,32        | 8,02E-05  | Probable ATP-citrate synthase                                    |
| Q18026               | flu-2           | 0,39             | -1,37        | 3,93E-08  | Kynureninase                                                     |
| A0A1I6CM93;Q22133    | tag-243         | 0,37             | -1,42        | 1,34E-02  | Uncharacterized protein                                          |
| P05690               | vit-2           | 0,37             | -1,42        | 0,00E+00  | Vitellogenin-2                                                   |
| Q9NAB3               | gst-27          | 0,37             | -1,43        | 2,72E-02  | Glutathione S-Transferase                                        |
| H2KZV5               | CELE_T21H3.1    | 0,36             | -1,47        | 8,79E-04  | Uncharacterized protein                                          |
| O02108;Q336L8        | cdc-37          | 0,36             | -1,48        | 6,83E-03  | Probable Hsp90 co-chaperone cdc37;Cell Division Cycle related    |
| H2KZL0;H2KZL1;Q9UA61 | CELE_W04B5.3    | 0,35             | -1,50        | 9,43E-03  | Galectin                                                         |
| Q9N384               | lec-6           | 0,35             | -1,50        | 1,26E-13  | Galectin                                                         |
| Q18040               | oatr-1          | 0,34             | -1,54        | 1,51E-13  | Probable ornithine aminotransferase, mitochondrial               |
| Q19130;Q95QM8        | gfat-1          | 0,34             | -1,56        | 1,56E-03  | Glutamine-Fructose 6-phosphate AminoTransferase homolog          |
| Q86FL8               | spp-5           | 0,33             | -1,58        | 5,24E-07  | SaPosin-like Protein family                                      |
| Q19699               | gfat-2          | 0,33             | -1,58        | 1,02E-07  | Glutamine-Fructose 6-phosphate AminoTransferase homolog          |
| Q22957               | F10G2.1         | 0,32             | -1,66        | 4,89E-02  | UPF0376 protein F10G2.1                                          |
| P19974               | cyc-2.1         | 0,31             | -1,70        | 3,75E-08  | Cytochrome c 2.1                                                 |
| P90889               | CELE_F55H12.4   | 0,30             | -1,72        | 9,93E-08  | Uncharacterized protein                                          |
| P18948;P18948-2      | vit-6           | 0,30             | -1,76        | 0,00E+00  | Vitellogenin-6;Isoform a of Vitellogenin-6                       |
| Q93315               | cytb-5.1        | 0,29             | -1,79        | 2,93E-02  | YTochrome B                                                      |
| P43510;Q8MQC6        | cpr-6           | 0,29             | -1,80        | 7,77E-13  | Cathepsin B-like cysteine proteinase 6;Cysteine PRotase related  |
| O02215               | cbl-1           | 0,28             | -1,83        | 1,43E-02  | Cystathionine Beta Lyase                                         |
| P46562               | alh-9           | 0,28             | -1,86        | 2,71E-31  | Putative aldehyde dehydrogenase family 7 member A1 homolog       |
| P41877               | isw-1           | 0,27             | -1,90        | 4,65E-02  | Chromatin-remodeling complex ATPase chain isw-1                  |
| G5ECL3               | prp-21          | 0,26             | -1,93        | 2,93E-03  | Pre-RNA processing 21                                            |
| Q9U3Q6               | ugt-22          | 0,25             | -1,99        | 1,82E-02  | UDP-glucuronosyltransferase                                      |
| P55216               | cth-2           | 0,18             | -2,49        | 1,06E-06  | Putative cystathionine gamma-lyase 2                             |
| P55155               | vit-1           | 0,18             | -2,51        | 4,77E-12  | Vitellogenin-1                                                   |
| O01467               | C04E6.5         | 0,14             | -2,84        | 2,69E-02  | Uncharacterized protein                                          |
| P06125               | vit-5           | 0,12             | -3,02        | 4,42E-67  | Vitellogenin-5                                                   |
| O17725               | CELE_D1086.3    | 0,07             | -3,79        | 3,16E-03  | Uncharacterized protein                                          |
| P18947               | vit-4           | 0,07             | -3,83        | 1,63E-316 | Vitellogenin-4                                                   |
| Q9N4J2               | vit-3           | 0,06             | -4,17        | 1,08E-04  | Vitellogenin-3                                                   |

**Table S4. GO enrichment analysis of proteins regulated between Lb21 and OP50-fed animals.** GO terms for biological process were applied for the enrichment and Holm-Bonferroni test correction. The analysis was made using Wormbase WormMine.

| GO Term                                                                              | p-value                  |
|--------------------------------------------------------------------------------------|--------------------------|
| <b>Up in Lb21 vs OP50</b>                                                            |                          |
| cellular component organization                                                      | 0.000001017313318119243  |
| cellular component organization or biogenesis                                        | 0.0000017535588143407388 |
| organelle organization                                                               | 0.0004567495982518751    |
| chromosome organization                                                              | 0.0007225474986842823    |
| chromatin organization                                                               | 0.0008999848036831534    |
| chromatin remodeling                                                                 | 0.0018729112205596117    |
| cellular protein-containing complex assembly                                         | 0.003400782727311353     |
| protein-containing complex assembly                                                  | 0.0034274874542153826    |
| RNA splicing                                                                         | 0.006106919181321311     |
| RNA splicing, via transesterification reactions                                      | 0.009304666640723882     |
| RNA splicing, via transesterification reactions with bulged adenosine as nucleophile | 0.009304666640723882     |
| mRNA splicing, via spliceosome                                                       | 0.009304666640723882     |
| protein-containing complex subunit organization                                      | 0.009678931766197298     |
| DNA conformation change                                                              | 0.017297380645726525     |
| embryo development ending in birth or egg hatching                                   | 0.01848370721419164      |
| cellular component assembly                                                          | 0.02707681487577866      |
| mRNA processing                                                                      | 0.032631535567242145     |
| protein-DNA complex assembly                                                         | 0.04068924956611012      |
| multicellular organism development                                                   | 0.05740695064932772      |
| anatomical structure development                                                     | 0.10301290759173488      |
| cell cycle                                                                           | 0.1100555911271732       |
| protein-DNA complex subunit organization                                             | 0.11239108341645751      |
| mitotic cell cycle                                                                   | 0.14307117703235073      |
| regulation of actin filament depolymerization                                        | 0.17632094462446374      |
| cellular component biogenesis                                                        | 0.2117288290627112       |
| developmental process                                                                | 0.23915472405451305      |
| mitotic cell cycle process                                                           | 0.2999436417273276       |
| mRNA metabolic process                                                               | 0.3577956773298709       |
| pre-replicative complex assembly involved in nuclear cell cycle DNA replication      | 0.3715463388437246       |
| pre-replicative complex assembly                                                     | 0.3715463388437246       |
| pre-replicative complex assembly involved in cell cycle DNA replication              | 0.3715463388437246       |
| cell cycle process                                                                   | 0.40207891841373977      |
| ATP-dependent chromatin remodeling                                                   | 0.43322625904097367      |
| epithelium development                                                               | 0.5498707023174321       |
| actin filament organization                                                          | 0.6537768030233341       |
| negative regulation of organelle organization                                        | 0.7731240887947824       |
| regulation of protein depolymerization                                               | 0.8913141393606872       |

### Down in Lb21 vs OP50

|                                                                                                 |                         |
|-------------------------------------------------------------------------------------------------|-------------------------|
| alpha-amino acid catabolic process                                                              | 1,73E+08                |
| cellular amino acid catabolic process                                                           | 3,99E+08                |
| oxidation-reduction process                                                                     | 4,03E+08                |
| alpha-amino acid metabolic process                                                              | 1,10E+07                |
| small molecule metabolic process                                                                | 0.000007910564474668729 |
| organic acid catabolic process                                                                  | 0.000008897367885061359 |
| carboxylic acid catabolic process                                                               | 0.000008897367885061359 |
| organonitrogen compound catabolic process                                                       | 0.0000093613538022047   |
| carboxylic acid metabolic process                                                               | 0.000013721590259318608 |
| cellular amino acid metabolic process                                                           | 0.00001911233453210145  |
| catabolic process                                                                               | 0.00002760882048968361  |
| organic substance catabolic process                                                             | 0.000056479314184191006 |
| oxoacid metabolic process                                                                       | 0.00006784882802413101  |
| mitochondrial electron transport, ubiquinol to cytochrome c                                     | 0.00012099944507635203  |
| small molecule catabolic process                                                                | 0.00024327555958363585  |
| organic acid metabolic process                                                                  | 0.0002928856607422161   |
| metabolic process                                                                               | 0.0026490345834080083   |
| L-phenylalanine metabolic process                                                               | 0.0036407070109367437   |
| L-phenylalanine catabolic process                                                               | 0.0036407070109367437   |
| erythrose 4-phosphate/phosphoenolpyruvate family amino acid metabolic process                   | 0.0036407070109367437   |
| erythrose 4-phosphate/phosphoenolpyruvate family amino acid catabolic process                   | 0.0036407070109367437   |
| organonitrogen compound metabolic process                                                       | 0.00415817932118776     |
| tyrosine metabolic process                                                                      | 0.010751845958574103    |
| sulfur compound metabolic process                                                               | 0.016370479664891243    |
| cofactor metabolic process                                                                      | 0.022012043825975162    |
| drug metabolic process                                                                          | 0.025421962867567354    |
| tyrosine catabolic process                                                                      | 0.05605693380765347     |
| valine metabolic process                                                                        | 0.05605693380765347     |
| cellular catabolic process                                                                      | 0.0632360013159324      |
| drug catabolic process                                                                          | 0.11112475873415989     |
| aromatic amino acid family catabolic process                                                    | 0.14741257488386564     |
| glutathione metabolic process                                                                   | 0.23853629036808935     |
| aromatic amino acid family metabolic process                                                    | 0.5782813396666809      |
| carboxylic acid biosynthetic process                                                            | 0.6591549733024149      |
| organic acid biosynthetic process                                                               | 0.6970734433625344      |
| branched-chain amino acid metabolic process                                                     | 0.8852662089593908      |
| ATP synthesis coupled electron transport mitochondrial ATP synthesis coupled electron transport | 0.98728015915758        |
| mitochondrial ATP synthesis coupled electron transport                                          | 0.98728015915758        |

**Table S5. Primers for *C. elegans* genotyping.**

| Mutant                  | Fwd primer sequence, 5'-3'                                 | Rev primer sequence, 5'-3'                                  |
|-------------------------|------------------------------------------------------------|-------------------------------------------------------------|
| <i>daf-16 (mu86)</i>    | tccgtgtgctgttcttctc                                        | ggaaggttgtagaagaacga (wt)<br>cgttcagtgtacgcc (mutant)       |
| <i>pmk-1 (km25)</i>     | ccatgacctcagagcctctt                                       | ttggctccgttacctggaat (wt)<br>tgtaccatcttggtgccacg (mutant)  |
| <i>dbl-1 (nk3)</i>      | ccttgctgtgtgcctactga (wt)<br>agattaccgctctgccaaat (mutant) | gcgacatagaagcgggtatc                                        |
| <i>tol-1 (nr2033)</i>   | cggttccgctgttgagttat                                       | cagcgtttccactcgttct (wt)<br>tcaaaaatataatcgctggtaa (mutant) |
| <i>acs-22 (tm3236)</i>  | ggttacaaaatgggcgacgt                                       | gagccgtacaactctccaat                                        |
| <i>asp-6 (tm2213)</i>   | catcacgtattactccggat                                       | caaacggcggactcgtaat                                         |
| <i>vit-2 (ok3211)</i>   | tcacatggaaaacgaggaca (from CGC)                            | gctctgggtgagaagacgg (from CGC)                              |
| <i>clcc-65 (ok2337)</i> | agcagcatcgccaactctat                                       | gcaaattgccggaattaaaa                                        |
| <i>srp-7 (ok1090)</i>   | caacataaccttctgctgca (from CGC)                            | ccgcaacagctacagtacca (from CGC)                             |

**Table S6. TaqMan Assay ID for pig PCR.**

| Markers Pig          | TaqMan Assay ID |
|----------------------|-----------------|
| TGF beta-1           | Ss04955543_m1   |
| <i>House-keeping</i> |                 |
| Beta-Actin           | Ss03376563_uH   |
| HPRT                 | Ss03388274_m1   |
| Ubiquitin            | Ss03383372_g1   |

## Supplementary methods

### **DNA sequencing**

Sequencing was performed by the company DNASense.

### ***Illumina library preparation and DNA sequencing***

Sequencing libraries were prepared using the NEB Next Ultra II DNA library prep kit for illumina (New England Biolabs, USA) following the manufacturer's protocol. The sequencing libraries were pooled in equimolar concentrations and diluted to 4 nM. The samples were paired end sequenced (2x301bp) on a MiSeq (Illumina, USA) using a MiSeq Reagent kit v3, 600 cycles (Illumina, USA) following the standard guidelines for preparing and loading samples on the MiSeq.

### ***Genome assembly and annotation***

The illumina sequence reads were trimmed for adaptors using cutadapt (v. 1.16, (Martin, 2011)). The trimmed reads were assembled using megahit (v. 1.1.3, (Li et al., 2016)). The reads were mapped back to the assembly using minimap2 (v. 2.12-r827 (Li, 2017)) to generate coverage files. Genome visualization was carried out using the mmgenome2 package (v. 2.0.12, (Karst et al., 2016)) in R (v. 3.5.1, (R Core Team, 2018)) using the R-studio environment. Genomes were refined and the final bins were annotated using PROKKA (v. 1.14-dev, (Seemann, 2014)), and completeness was estimated using CheckM (Parks et al., 2015). The genomes were classified using GTDB-TK (v. 0.2.2, (Parks et al., 2018)). Genomes were aligned using fastANI (v. 1.1, (Jain et al., 2018)). Protein orthology was computed using Proteinortho (v. 5.16b, (Lechner et al., 2011)).

### **Mass spectrometry**

#### ***Mass spectrometry-based quantification of host-response***

A combination of data dependent analysis (DDA) and data independent analysis (DIA) tandem liquid chromatography MS (LC-MS/MS) analysis was applied to identify and quantify proteins. In DDA, precursor ions from the MS scan are selected in a semi-random manner, typically isolating and fragmenting only the most abundant ions for fragmentation and MS/MS analysis, resulting in an incomplete coverage of complex samples. In the DIA-based sequential window acquisition of all theoretical spectra (SWATH) method, practically all precursor ions are fragmented using selected mass ranges instead of single  $m/z$  ratios for MS filtering. Theoretically, time-resolved MS and MS/MS data is obtained for all precursors in order to support identification and quantification of proteins from even complex tissue samples. However, SWATH analysis results in highly complex MS/MS spectra: hence, for protein identification, SWATH analysis requires a spectral library based on DDA data containing fragmentation patterns for all peptides (Hu et al., 2016). In this study, the

spectral library was based on DDA data from the original sample-set and built prior to the main SWATH analysis.

Replicate analysis ( $n=4$  for Lb21 and Lb23 and  $n=3$  for OP50) of each of the three sample groups was used to generate a spectral library as well as to make protein identifications and relative quantifications.

### ***Growth and harvest of nematodes for proteome analysis***

To prepare samples for proteome analysis, three-days-old *rff-3* developed on UV-treated OP50 were carefully washed in S-basal and shifted to either Lb21, Lb23 or OP50 seeded NGM plates. On day five, approximately 1000 worms per replicate were washed in S-basal and gently pelleted. Supernatants were aspirated and worm pellets were snap-frozen in liquid nitrogen and stored at  $-80^{\circ}\text{C}$  for subsequent protein extraction and proteome analysis. The sample date was selected based on the MRSA killing assay, where worms were also pre-conditioned with Lb21, Lb23 or OP50 for two days prior to pathogen exposure.

### ***Nematode disruption and sample preparation for LC-MS/MS analysis***

Frozen worm pellets were thawed on ice and lysed in one pellet-volume of 50 mM Triethylammonium bicarbonate (Sigma-Aldrich/Merck, Missouri, United States) + 1% Sodium deoxycholate (Sigma-Aldrich/Merck), pH 8.5. 0.3 g of different-sized ceramic/glass beads (B. Braun Biotech International AG, Melsungen, Germany) were added and samples were homogenized by beat-beating using a Precellys 24 tissue homogenizer (Bertin Instruments, Montigny-le-Bretonneux, France) in three cycles of 3x 6,000 rpm for 20 sec, with 30 sec breaks in between runs. Samples were snap-frozen in liquid nitrogen in between the three cycles to avoid sample warm-up and to increase cell lysis. Samples incubated 10 min at  $95^{\circ}\text{C}$  to increase protein extraction and subsequently cooled on ice. Homogenates were centrifuged at 13,000 rpm for 20 min,  $4^{\circ}\text{C}$  to pellet worm and cell debris, and supernatants were collected in LoBind tubes (Eppendorf AG, Hamburg, Germany). Protein concentrations were measured using the Pierce BCA protein assay kit (Thermo Fisher Scientific, MA, United States) with bovine serum albumin as standard. Cysteine residues were reduced in 10 mM dithiothreitol for 30 min at  $56^{\circ}\text{C}$ , followed by alkylation of the formed thiol groups in 55 mM iodoacetamide for 30 min in the dark at  $20^{\circ}\text{C}$ . Protein concentration were adjusted to  $1\ \mu\text{g}/\mu\text{L}$ , and enzymatic digestion of the proteins was performed by the addition of trypsin (Sigma-Aldrich/Merck) (enzyme to protein ratio of 1:50 w/w) followed by over-night digestion at  $37^{\circ}\text{C}$ . Sodium deoxycholate was subsequently removed by acid precipitation with formic acid ( $\text{pH}<2.5$ ), samples were centrifuged at 13,000 rpm for 20 min at  $4^{\circ}\text{C}$  and soluble peptides were recovered.



### **LC-MS/MS analysis**

DDA and SWATH runs were performed in a concatenated fashion for all samples. Synthetic indexed retention time (iRT) peptide standards (Biognosys, Schlieren, Switzerland) were spiked into all digested samples in a 1:25 ratio (v/v) to support accurate retention time calibration between individual files. For building the spectral library, LC-MS/MS analyses of all replicates were performed using the DDA method. For each sample, 5 µg peptide material was injected into an Eksigent NanoLC 415 system (AB/Sciex, MA, United States) coupled to TripleTOF 6600 mass spectrometer (AB/Sciex) and a DuoSpray Ion Source (AB/Sciex) controlled by Analyst TF 1.71 software (AB/Sciex). The Eksigent NanoLC 415 system controls the gradients of the buffers and contains a YMC-Triart C18 trap column (0.5 mm x 5.0 mm, 3 µm particles, YMC) and a C18 analytical column (0.3 mm x 150 mm, 3 µm particles, YMC). The trap column was used to purify the peptides before eluting them onto the analytical column and the analytical column to separate the peptides prior to the MS analysis. An 87 min gradient from 95% to 20% buffer A (0.1% formic acid in water) and from 5% to 80% buffer B (0.1% formic acid in acetonitrile) at a flow rate of 5 µL/min was applied for chromatography. The DDA mode was applied over a mass range of 400-1250  $m/z$  with an accumulation time of 0.25 s, followed by product ion scans of a maximum of 30 candidate ions within each cycle. The following settings were used: Floating ion spray voltage of 5500 V, curtain gas of 25 psi, ion source gas 1 of 10 psi, collision energy of 10 V, and declustering potential of 90 V.

For the SWATH analysis, 5 µg peptide material was analyzed using the same technical set up as for the DDA analyses with identical chromatographic parameters, but with a gradient of 57 min. SWATH-MS analysis was performed in a looped product ion mode, with a set of 100 consecutive windows across a range of  $m/z$  values from 400-1250. Accumulation time was 0.25 s for the TOF-MS scan and 25 ms for the product ion scan.

### **Spectral library generation and data analysis**

A spectral library was created based on DDA files from all sample groups. Unprocessed, raw *.wiff* files were searched as a merged file using ProteinPilot 5.0.1 (AB/Sciex) against a search database containing sequences from *C. elegans* (ref. proteome 1940), *E. coli* K12 (ref. proteome 0625), *Levilactobacillus brevis* ATCC 367/JCM (ref. proteome 1170), Ref. proteomes were downloaded from <http://www.uniprot.org/> July 31, 2018; 34,862 entries in total. iRT peptide and general contaminants sequences were added to the database.

Search parameters were as follow: Fixed modifications = alkylation of cysteines (iodoacetamide); digestion = trypsin; instrument = TripleTOF 6600; search effort = thorough ID; confidence scores > 0.05, which equals 1% FDR at the peptide level. Protein detections were accepted when the ProtScore (given by the Protein Pilot software) was >1.3 (equivalent to 95% confidence) and a

minimum of two peptides per protein was set as criteria for confident protein assignment. The ProteinPilot-generated *.group* file was imported as a spectral library into Spectronaut Pulsar (Biognosys). Spectronaut is a proteomics software aimed at analyzing DIA proteomics experiments and was used to identify and make relative quantifications (and comparisons between sample groups) of proteins based on the MS-SWATH data and the DIA-based spectral library. Spectronaut default settings were applied, and for identification, protein and precursor Qvalue cut offs were set to 0.01, corresponding to an FDR of 1%, and Qvalue percentile for quantification was set to 0.7 (full precursor profile across 70% of all samples). Differential abundance grouping was calculated based on precursor ions (summed fragment ions) and t-tests were performed on log(2) ratios of these quantities, and proteins regulated between Lb21/Lb23/OP50 (Qvalue<0.05 and log2 ratio > 0.58 or log2 ratio < -0.58) were returned by Spectronaut. A heat map was generated using the free software Heatmapper and based on Euclidean Distance Measurement Method and the Average Linkage Clustering Method. To visualize the grouping of the regulated protein, the free software Venny was applied. Proteins were grouped according to regulation, and functionally annotated using the Gene Ontology (GO) terminology and enrichment analyses of all groups (up- and down regulated in Lb21 versus Lb23 and Lb21 versus OP50) were performed using Wormbase WS273 Intermine data mining platform for *C. elegans* and related nematodes. For enrichment analysis, a Holm-Bonferroni test correction was applied and only GO terms for biological process.

## References:

- Jain, C.,** Rodriguez-R, L.M., Phillippy, A.M., Konstantinidis, K.T., and Aluru, S. (2018) High throughput ani analysis of 90K prokaryotic genomes reveals clear species boundaries. *Nature communications* **9**: 5114.
- Karst, S.M.,** Kirkegaard, R.H., and Albertsen, M. (2016) Mmgenome: a Toolbox for Reproducible Genome Extraction From Metagenomes. *bioRxiv* 059121.
- Lechner, M.,** Findeiß, S., Steiner, L., Marz, M., Stadler, P.F., and Prohaska, S.J. (2011) Proteinortho: Detection of (co-) orthologs in large-scale analysis. *BMC bioinformatics* **12**: 124.
- Li, D.,** Luo, R., Liu, C.-M., Leung, C.-M., Ting, H.-F., Sadakane, K., et al. (2016) MEGAHIT v1. 0: A fast and scalable metagenome assembler driven by advanced methodologies and community practices. *Methods* **102**: 3–11.
- Li, H.** (2017) Minimap2: Fast pairwise alignment for long dna sequences. *arXiv preprint arXiv:1708.01492*.
- Martin, M.** (2011) Cutadapt removes adapter sequences from high-throughput sequencing reads. *EMBnet.journal* **17**: 10.

**Parks**, D.H., Chuvochina, M., Waite, D.W., Rinke, C., Skarshewski, A., Chaumeil, P.-A., and Hugenholtz, P. (2018) A standardized bacterial taxonomy based on genome phylogeny substantially revises the tree of life. *Nature biotechnology*.

**Parks**, D.H., Imelfort, M., Skennerton, C.T., Hugenholtz, P., and Tyson, G.W. (2015) CheckM: Assessing the quality of microbial genomes recovered from isolates, single cells, and metagenomes. *Genome research* gr-186072.

**R Core Team** (2018) R: A language and environment for statistical computing R Foundation for Statistical Computing, Vienna, Austria.

**Seemann**, T. (2014) Prokka: Rapid prokaryotic genome annotation. *Bioinformatics* **30**: 2068–2069.

**Hu**, A., Noble, W. S. & Wolf-Yadlin, A. Technical advances in proteomics: New developments in data-independent acquisition. F1000Research (2016) doi:10.12688/f1000research.7042.1.
